# Supplementary material for: Activity of vitamin D receptor agonists against dengue virus
Source: PubMed Central journal article supplement (PMC7331731; doi:10.1038/s41598-020-67783-z), 2020-07-02

## Supplemental Materials

### Activity of vitamin D receptor agonists against dengue virus

**Janejira Jaratsittisin<sup>1</sup>, Bin Xu<sup>2</sup>, Wannapa Sornjai<sup>1</sup>, Zhibing Weng<sup>2</sup>, Atichat Kuadkitkan<sup>1</sup>, Feng Li<sup>2</sup>, Guo-Chun Zhou<sup>2\*</sup>, Duncan R. Smith<sup>1\*</sup>**

<sup>1</sup>Institute of Molecular Biosciences, Mahidol University, Salaya, 73170, Thailand

<sup>2</sup> School of Pharmaceutical Sciences, Nanjing Tech University, Nanjing 211816, Jiangsu, China

\*Correspondence should be addressed to [gczhou@njtech.edu.cn](mailto:gczhou@njtech.edu.cn) (GCZ) or [duncan\\_r\\_smith@hotmail.com](mailto:duncan_r_smith@hotmail.com) (DRS)

Supplemental Figure S1. Cytotoxicity of vitamin D receptor agonists by trypan blue staining and MTT assay

Supplemental Figure S2. Cytotoxicity of vitamin D receptor agonists by the alteration of cell morphology

Supplemental Figure S3. Half-maximum effective concentration (EC<sub>50</sub>) of vitamin D receptor agonists

Supplemental Figure S4. Virucidal activity of vitamin D receptor agonists

Supplementary Table S1. Chemical structures of VDR agonists

Legend to Supplemental movies. VDR localization by immunofluorescence assay

Uncropped western blots

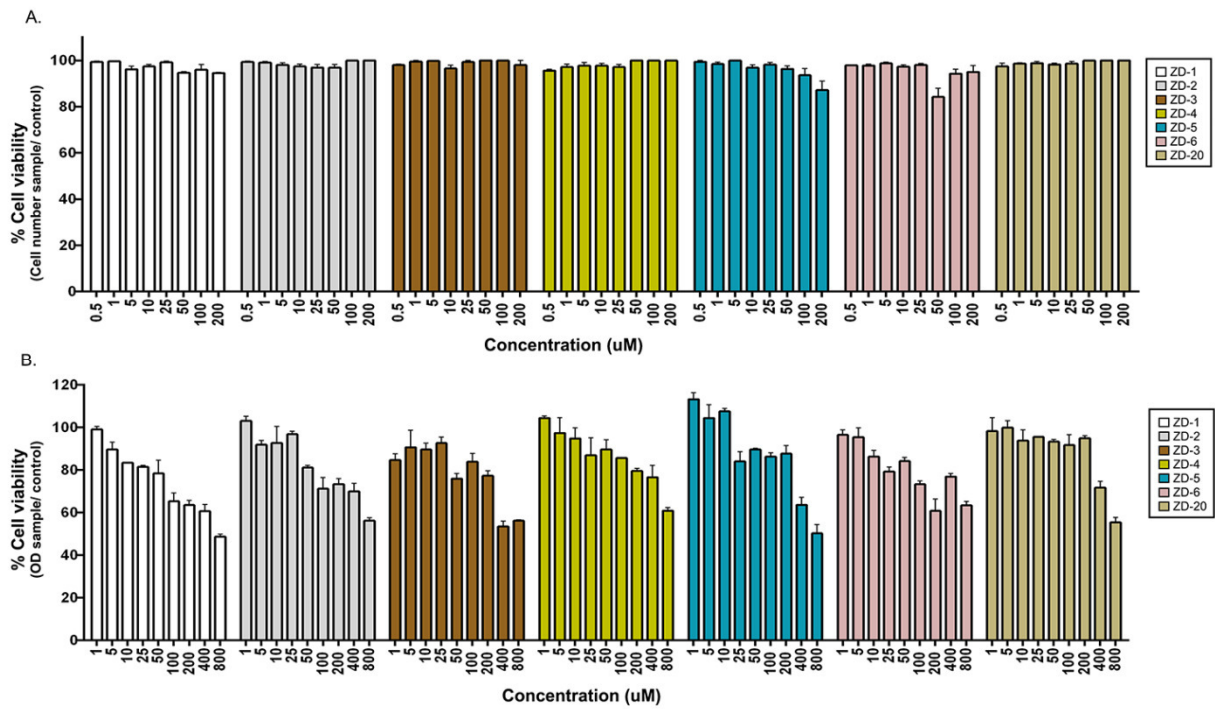

**Supplemental Figure S1. Cytotoxicity of vitamin D receptor agonists by trypan blue staining and MTT assay.** HEK293T/17 cells were cultured and incubated with the indicated various concentrations of VDR agonists for 24h. the treated cells were examined the cytotoxicity using 0.4% trypan blue staining (A) and MTT assay (B). The percentage of cell viability was calculated compared with complete media treated cells. The experiments were performed independently triplicate for trypan blue staining and four replicates for MTT assay.

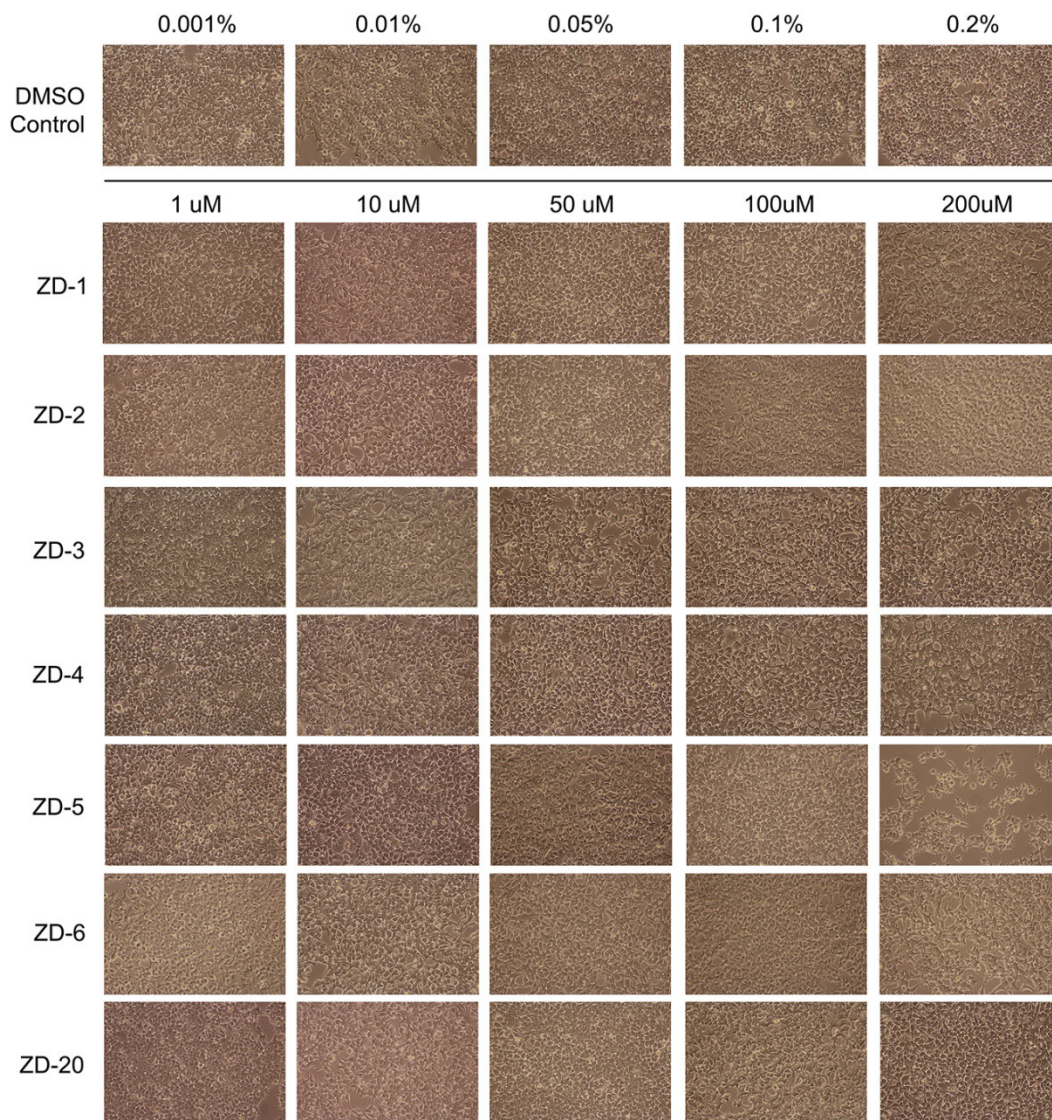

**Supplemental Figure S2. Cytotoxicity of vitamin D receptor agonists by the alteration of cell morphology.** HEK293T/17 cells were cultured and treated with various concentrations of VDR agonists (ZD-1, ZD-2, ZD-3, ZD-4, ZD-5, ZD-6 and ZD-20), together with the DMSO diluent control. After the incubation for 24h, the treated cells were observed and captured using inverted microscopy. The experiments were performed independently triplicate.

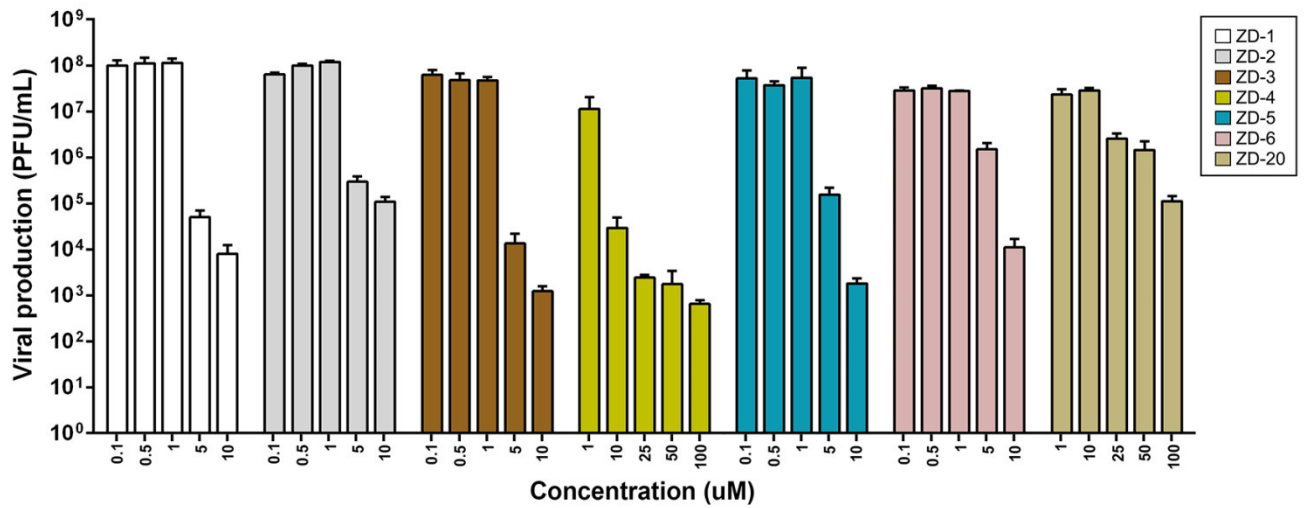

**Supplemental Figure S3. Half-maximum effective concentration (EC<sub>50</sub>) of vitamin D receptor agonists.** HEK293T/17 cells were incubated with 0.1-10 μM of ZD-1, -2, -3, -5, -6 or 1-100 μM of ZD-4 and -20 for 24 h. The supernatant was collected and viral production determined via standard plaque assay. The experiments were performed independently in triplicate with duplicate plaque assay.

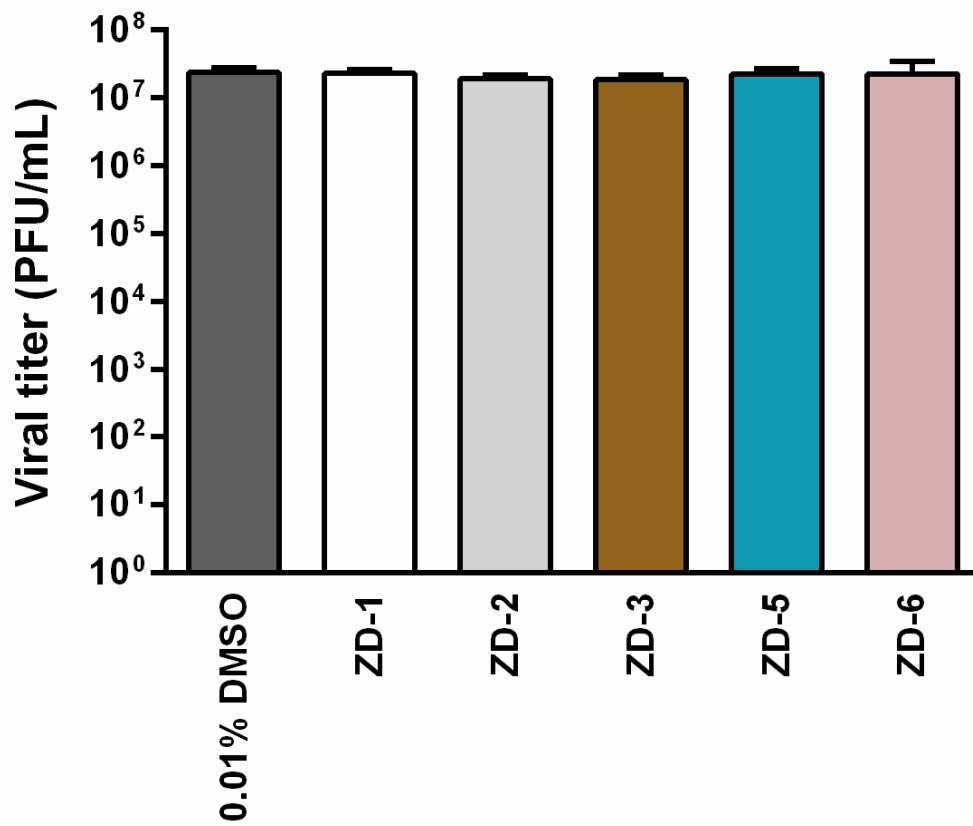

**Supplemental Figure S4. Virucidal activity of vitamin D receptor agonists.** A mixture of DENV 2 and 10  $\mu$ M of vitamin D receptor agonists were incubated at 37°C for one hour before determining virus titer by standard plaque assay. DMSO treated virus was used as a control of this experiment. The experiment was performed independently in triplicate and duplicate in plaque assay.

**Supplementary Table S1.** Structures, IDs, compound ID, chemical formulas and formula weights of 7 VDR agonists.

|                                                                                                                                                                     |                                                                                                                                                                   |                                                                                                                                                                    |
|---------------------------------------------------------------------------------------------------------------------------------------------------------------------|-------------------------------------------------------------------------------------------------------------------------------------------------------------------|--------------------------------------------------------------------------------------------------------------------------------------------------------------------|
| 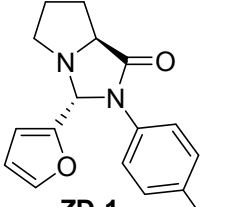 <p><b>ZD-1</b><br/> <math>C_{16}H_{15}N_3O_4</math><br/> Mol. Wt.: 313.31</p>     |  <p><b>ZD-3</b><br/> <math>C_{23}H_{27}ClN_4O_5S</math><br/> Mol. Wt.: 507</p>   |  <p><b>ZD-5</b><br/> <math>C_{21}H_{23}N_3O_5</math><br/> Mol. Wt.: 397.42</p>  |
|  <p><b>ZD-2</b><br/> <math>C_{19}H_{19}N_3O_5</math><br/> Mol. Wt.: 369.37</p>    |  <p><b>ZD-4</b><br/> <math>C_{28}H_{35}N_5O_6S</math><br/> Mol. Wt.: 569.67</p> |  <p><b>ZD-6</b><br/> <math>C_{18}H_{17}N_3O_4</math><br/> Mol. Wt.: 339.35</p> |
|  <p><b>ZD-20</b><br/> <math>C_{28}H_{34}N_4O_7S</math><br/> Mol. Wt.: 570.66</p> |                                                                                                                                                                   |                                                                                                                                                                    |

**Supplemental movie 1. VDR localization by immunofluorescence assay.** HEK293T/17 cells were (A) mock-infected, (B) DENV 2 infected or (C) DENV 2 infected and treated with 10  $\mu$ M ZD-6. After 24h of treatment, cells were processed under standard protocol of immunofluorescence assay. DENV E (green) protein and VDR (red) were detected using specific antibodies. Cells were stained with DAPI (blue). All signals were observed and produced as a 3D structure movie under confocal microscope LSM 800 w Airyscan (ZEISS, Oberkochen , Germany).

Time-of-additional effect of VDR agonist  
on viral protein expression via western blot assay  
VDR agonists: ZD-1, ZD-2, ZD-3, ZD-5 and ZD-6  
(Protein: NS5, NS3, E, NS1 and GAPDH)



ZD-1

# ZD-1: NS5

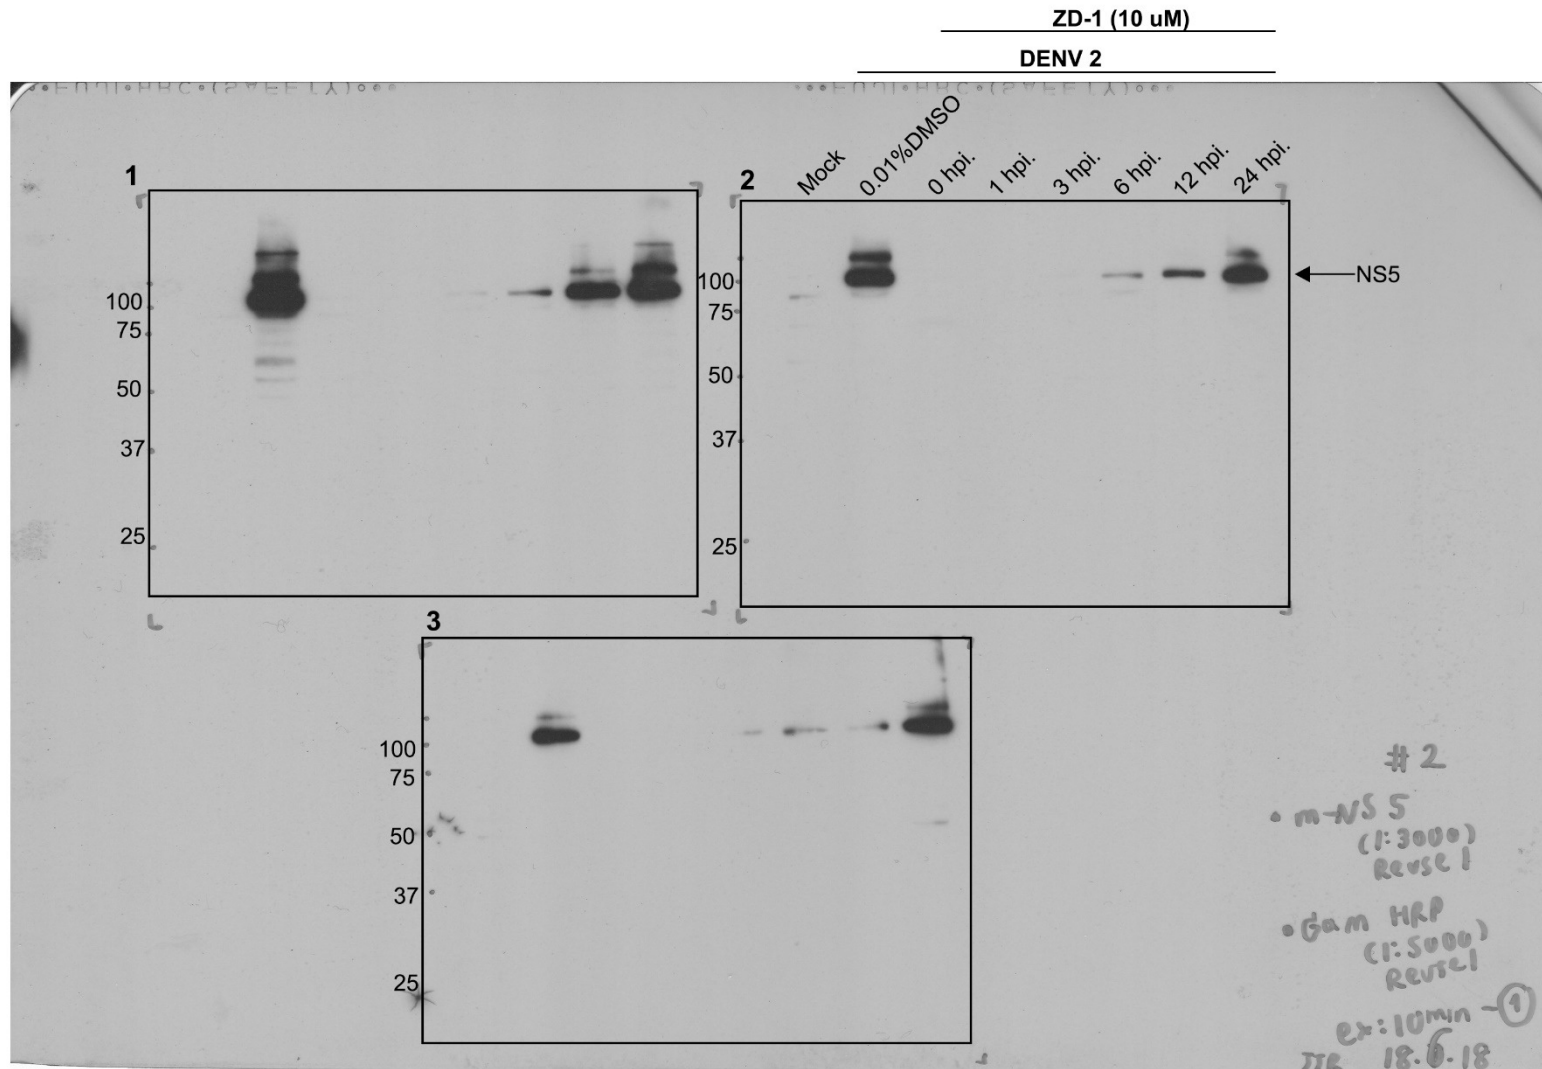

# ZD-1: NS3

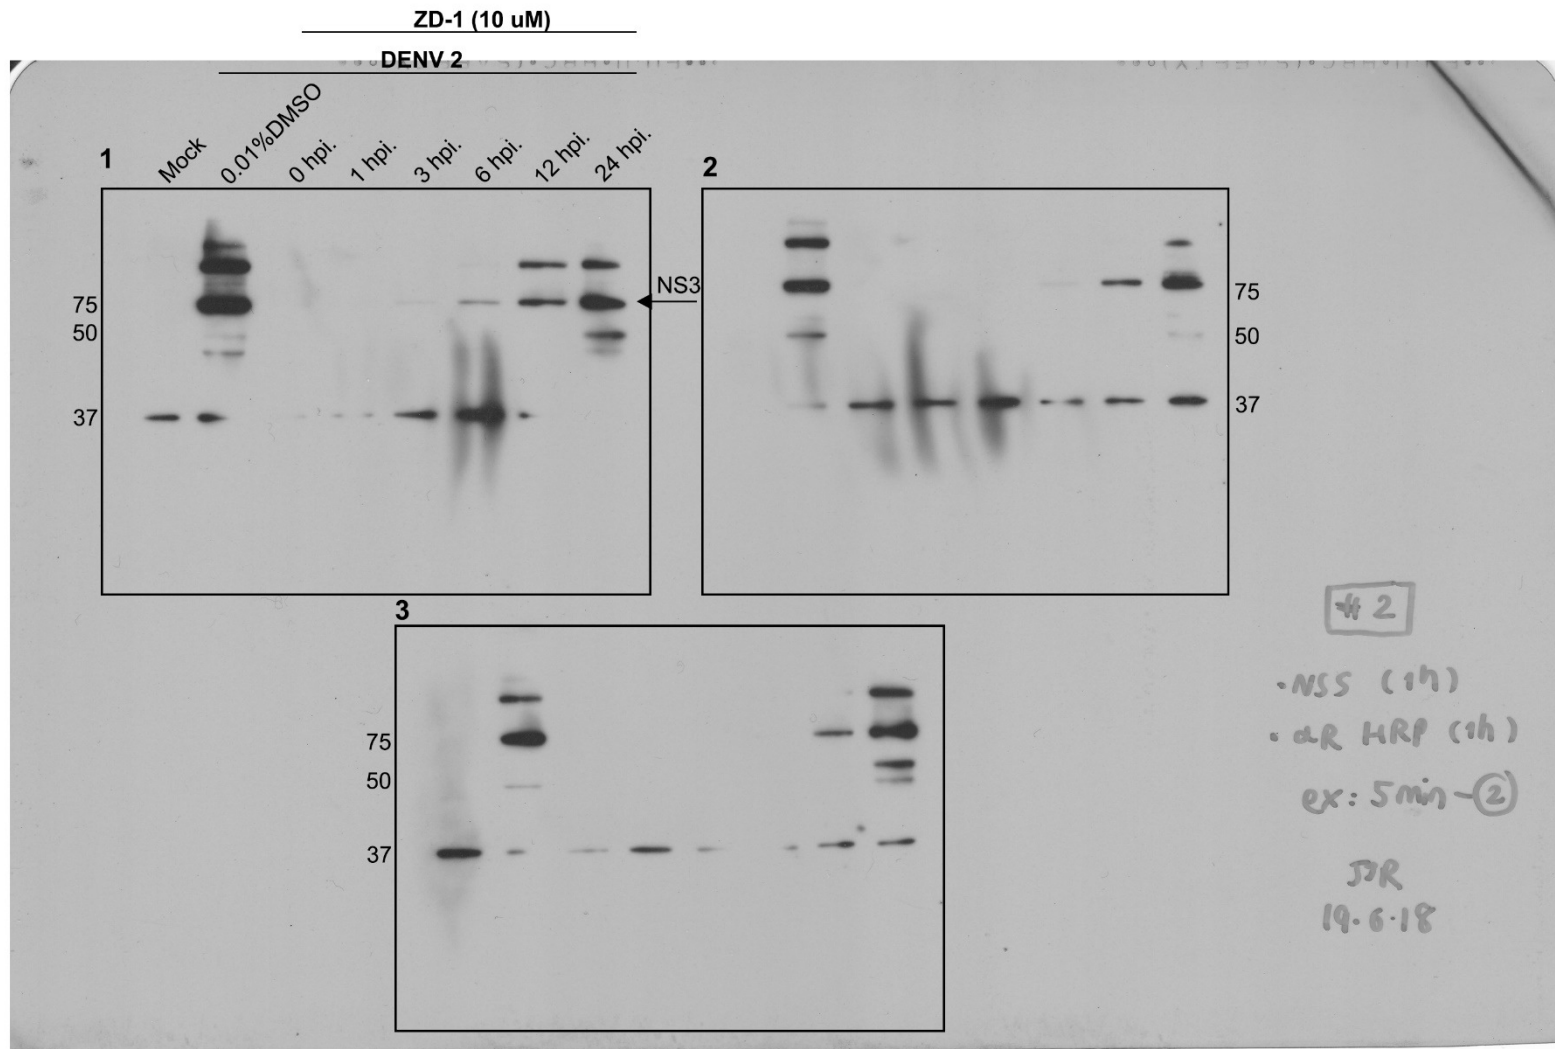

**ZD-1: E**

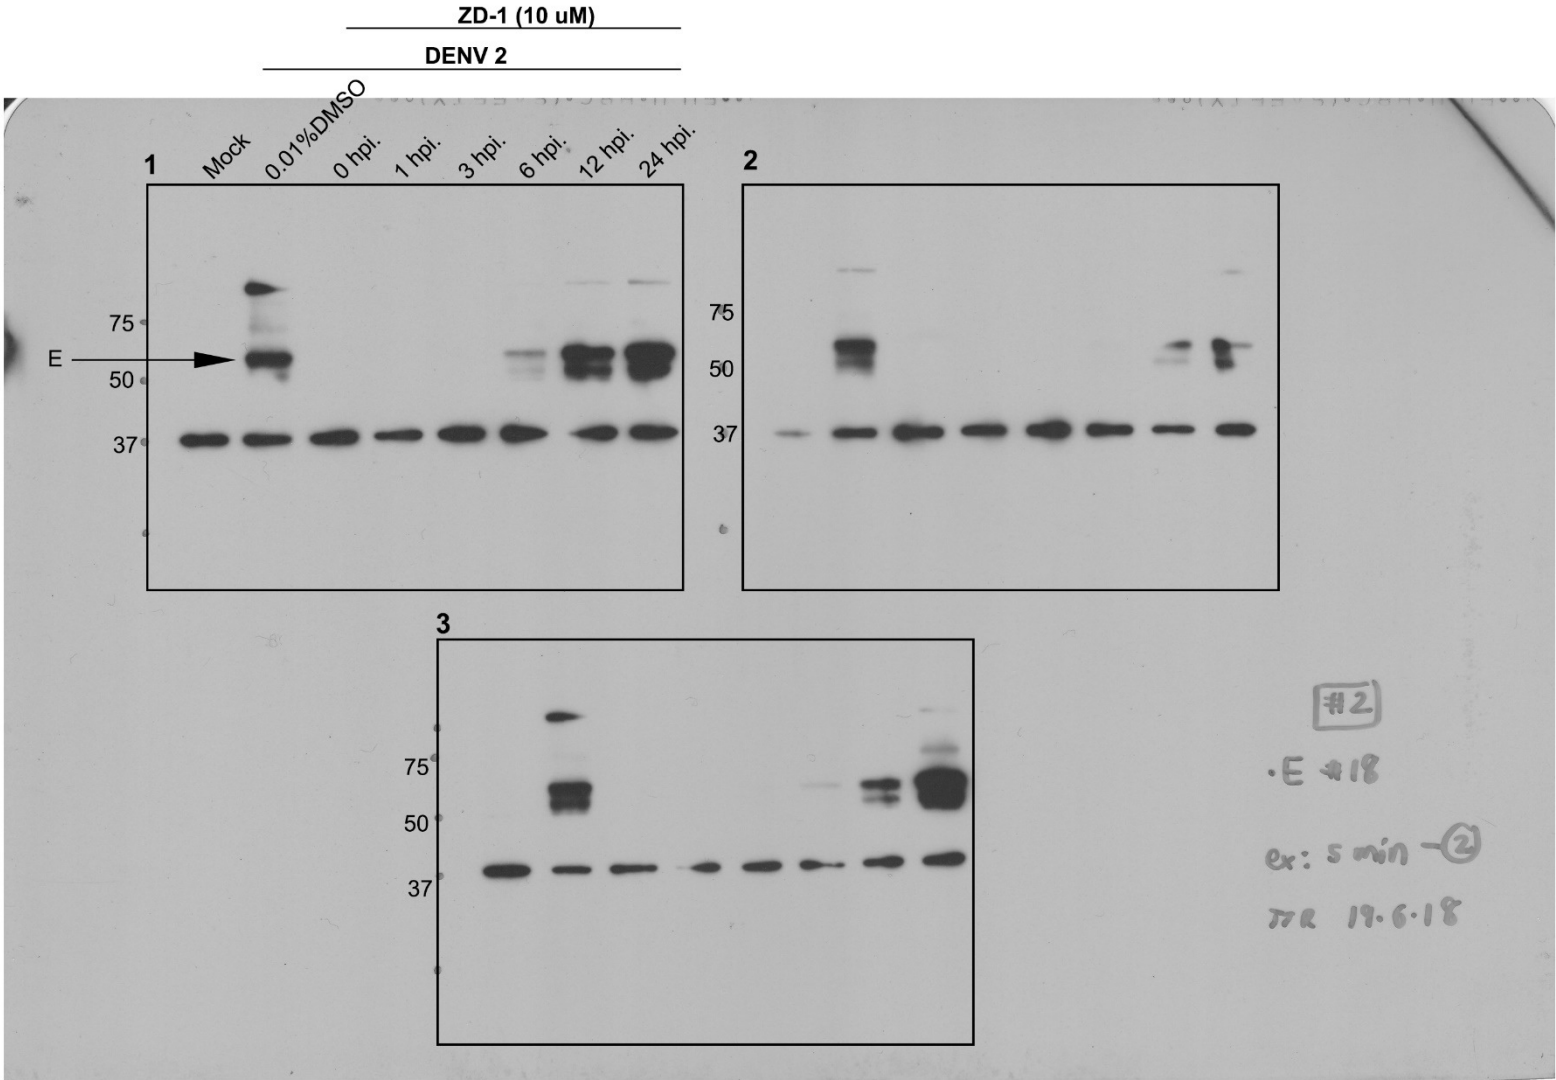

# ZD-1: NS1

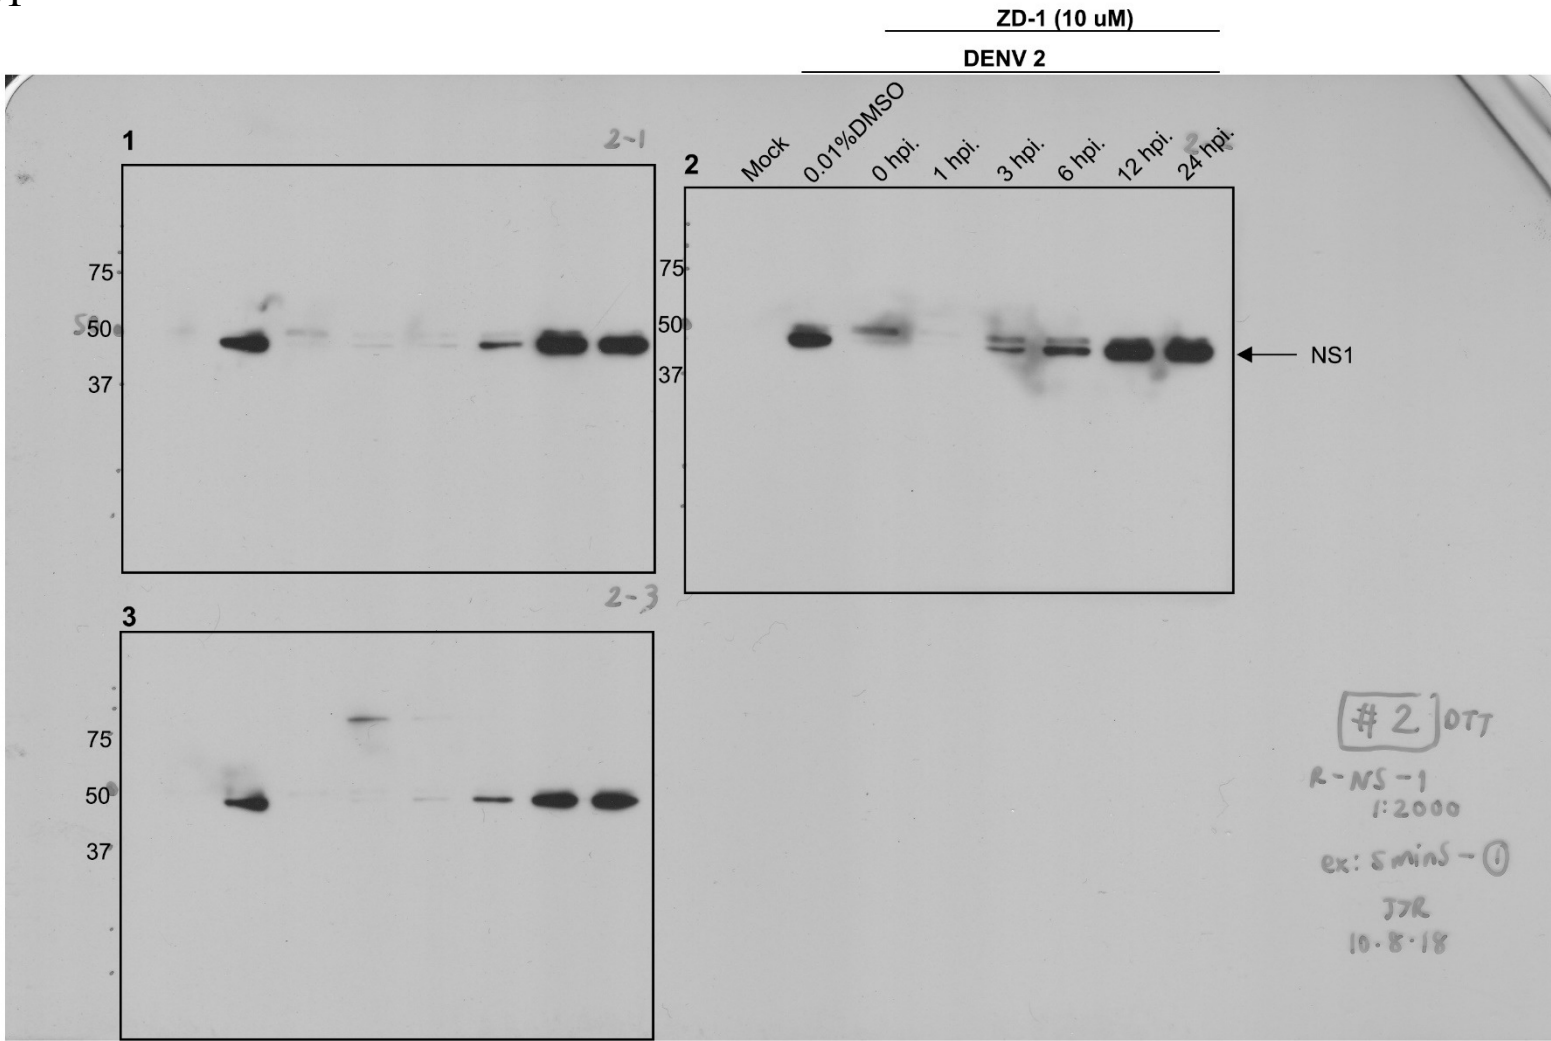

# ZD-1: GAPDH

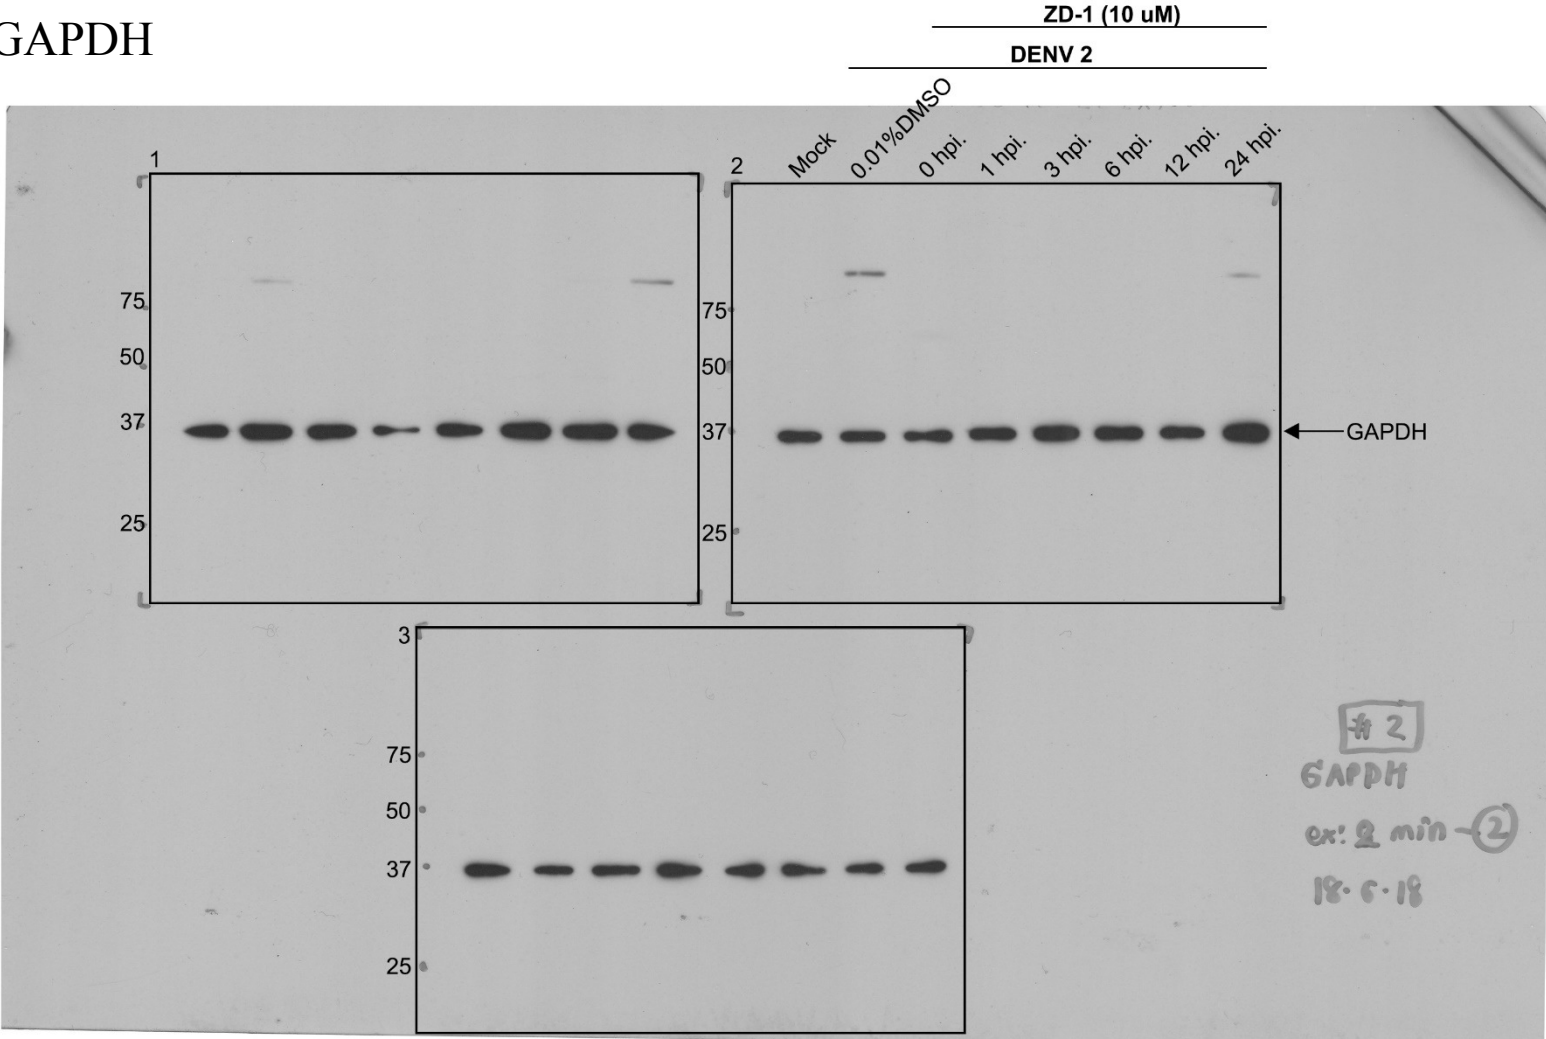

ZD-2

**ZD-2: NS5**

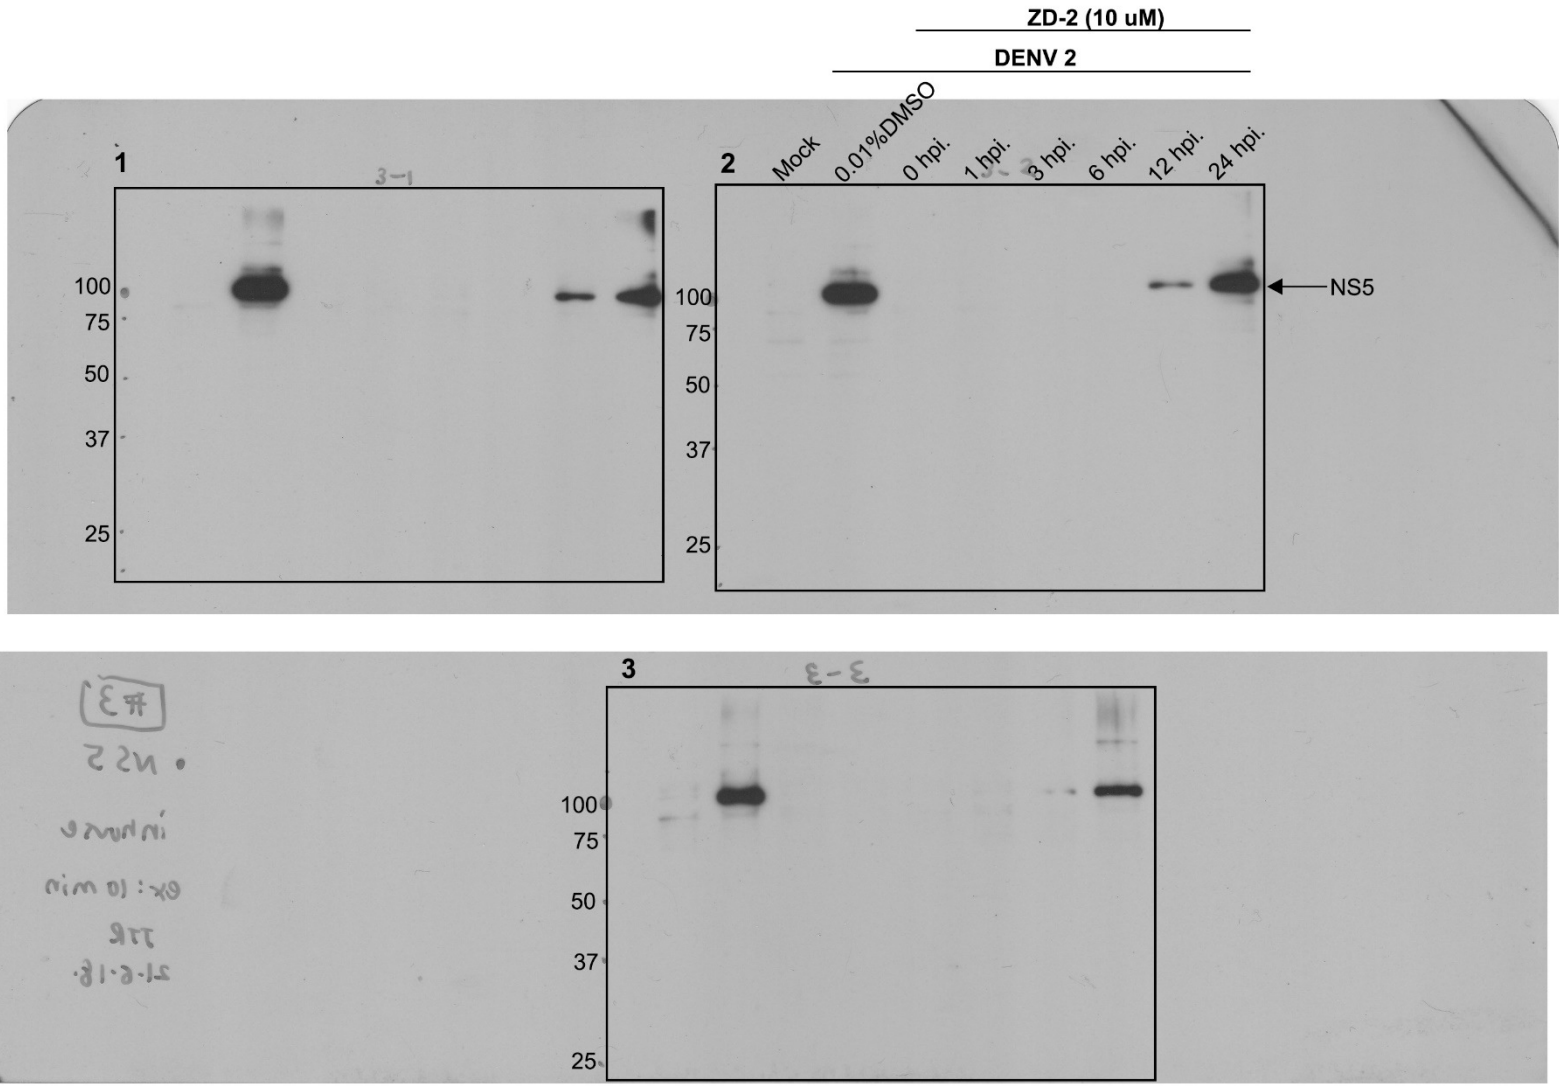



# ZD-2: NS3

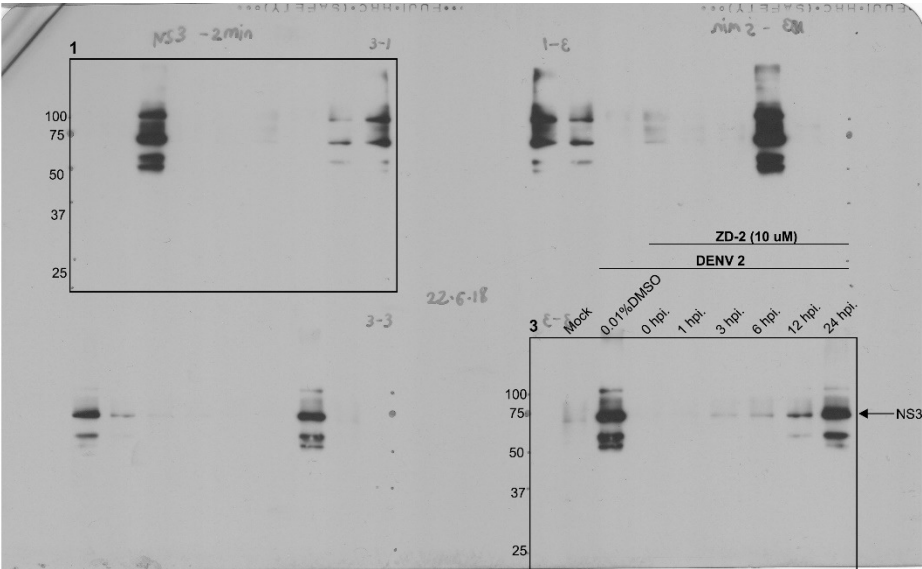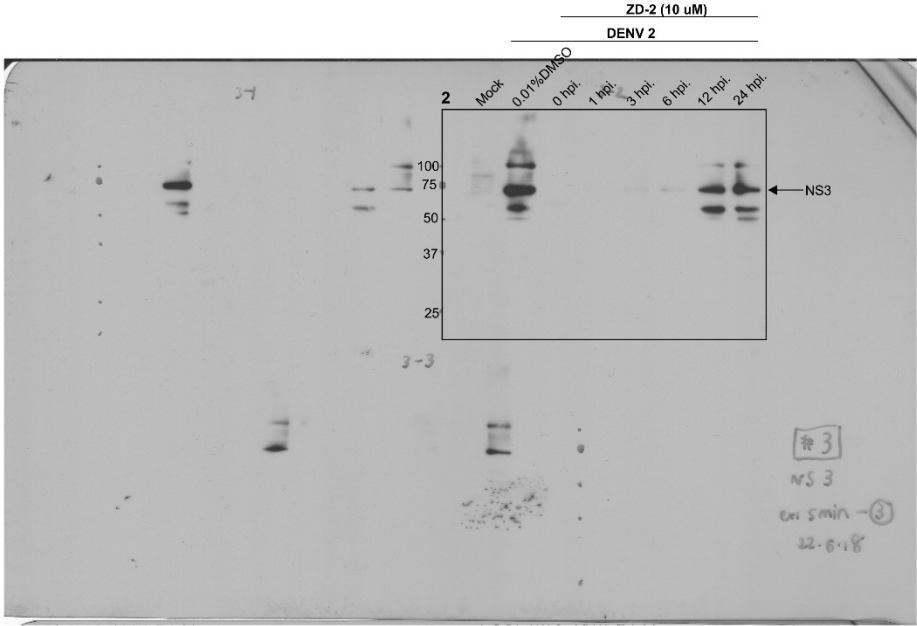

**ZD-2: E**

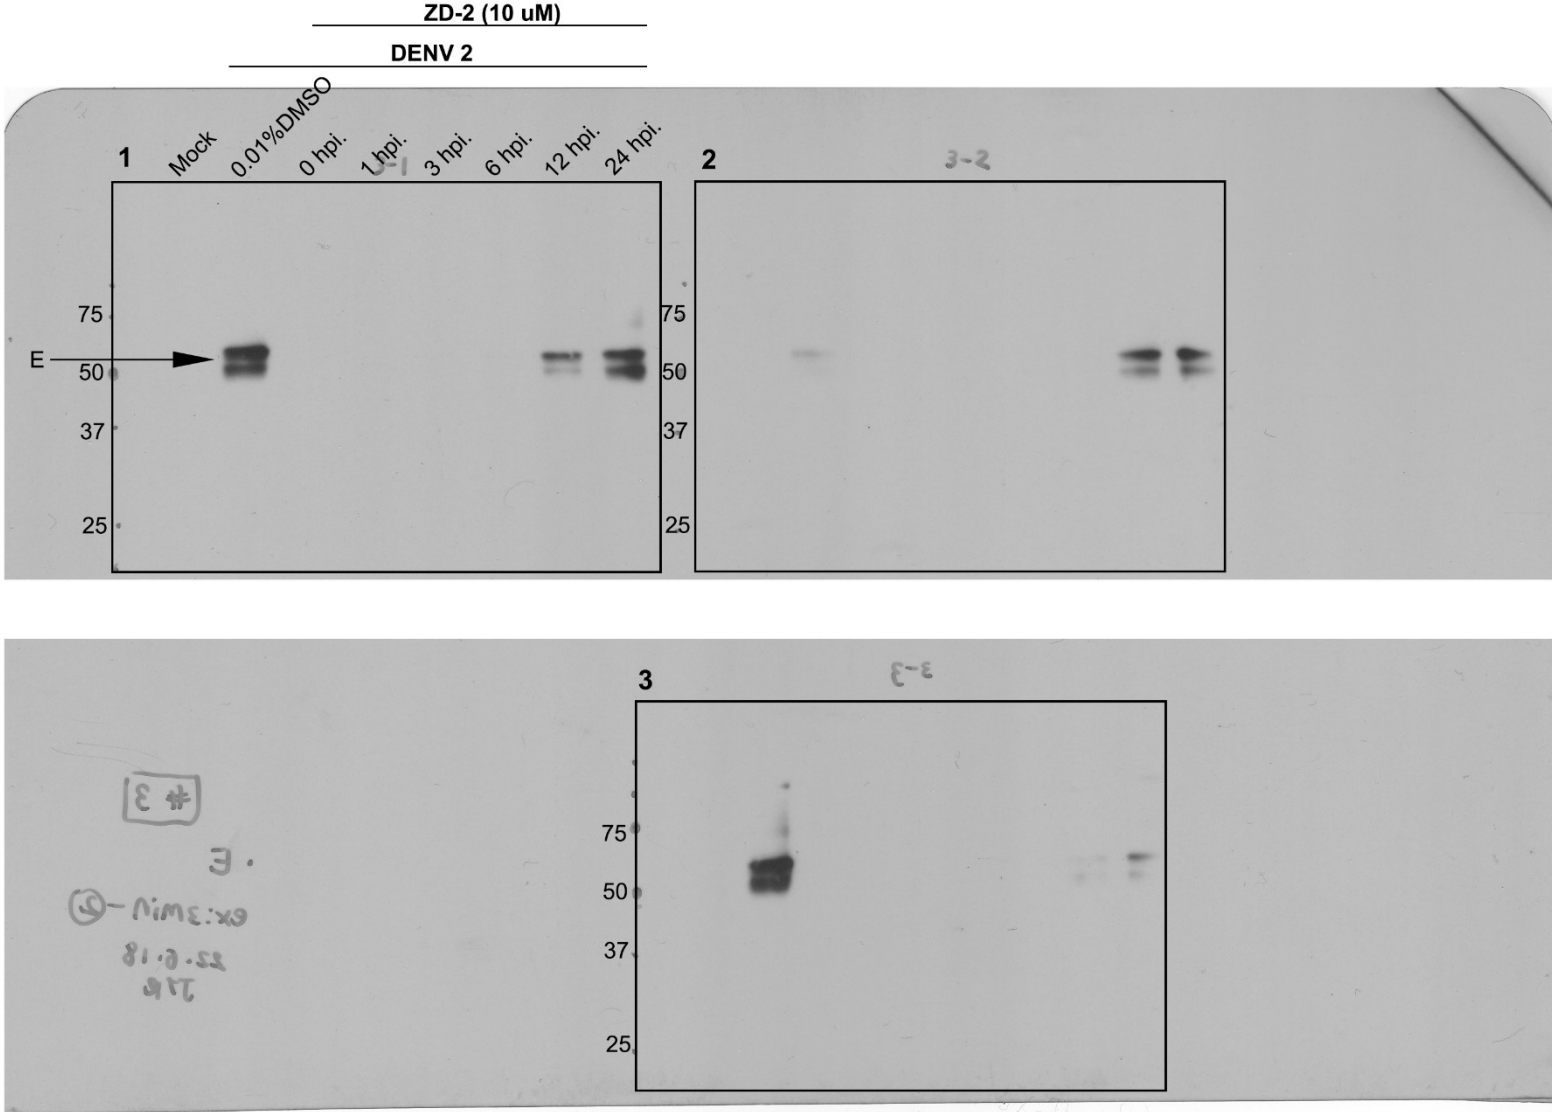

# ZD-2: NS1

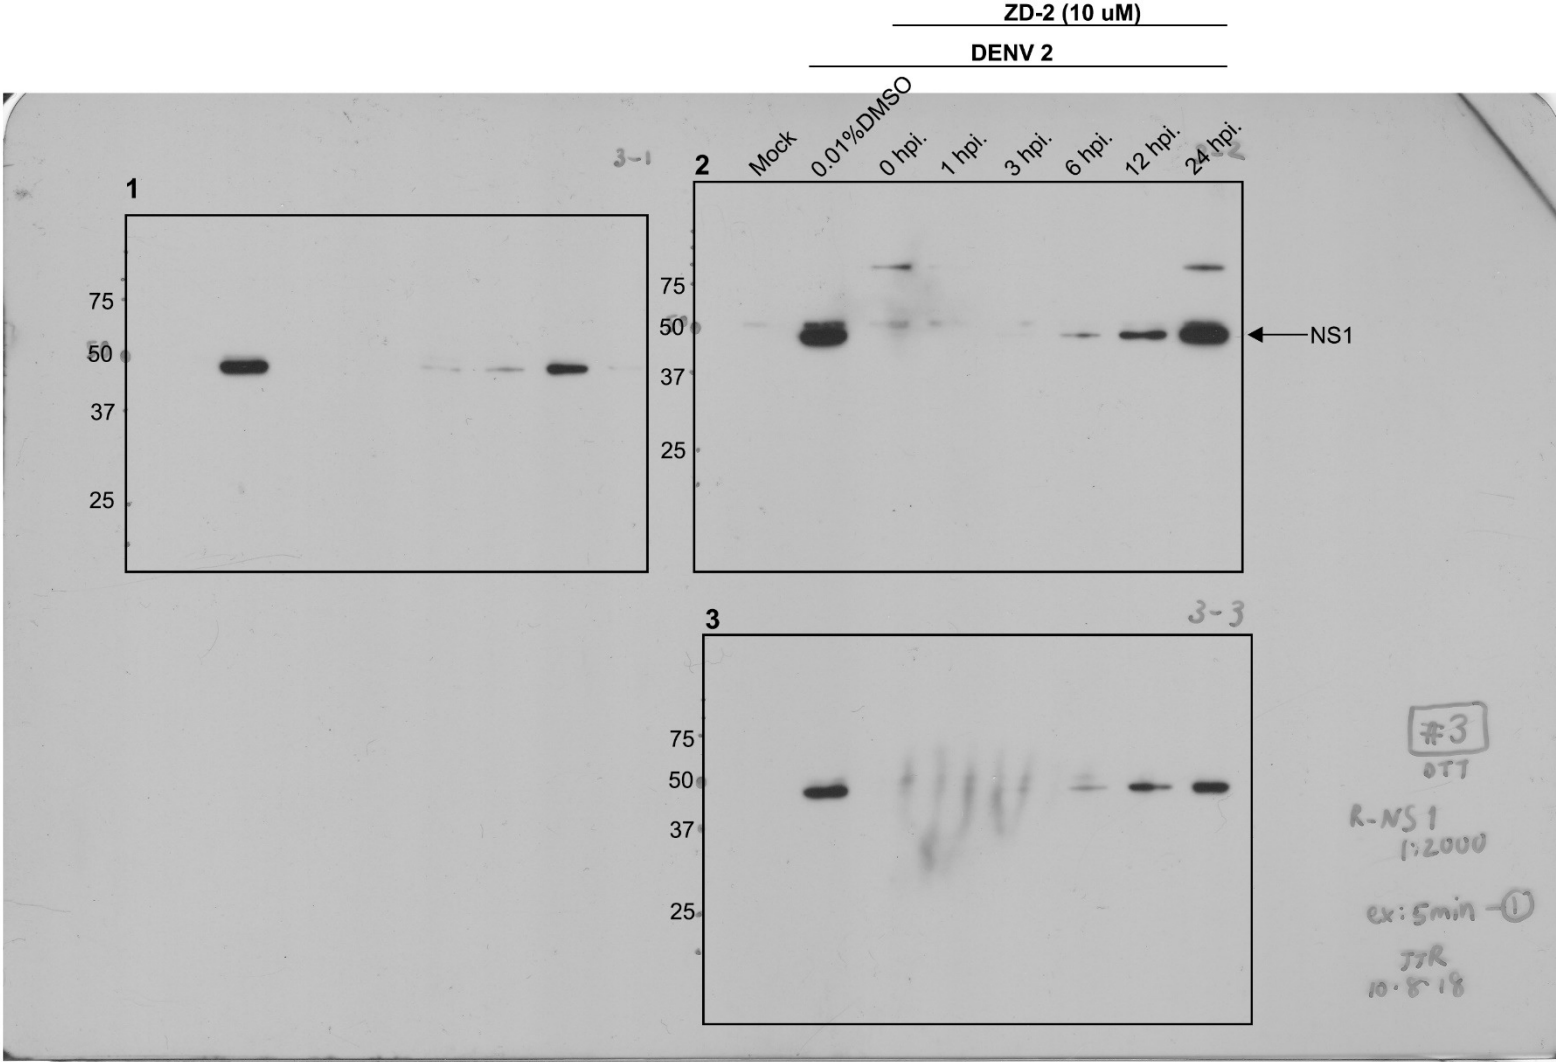

**ZD-2: GAPDH**

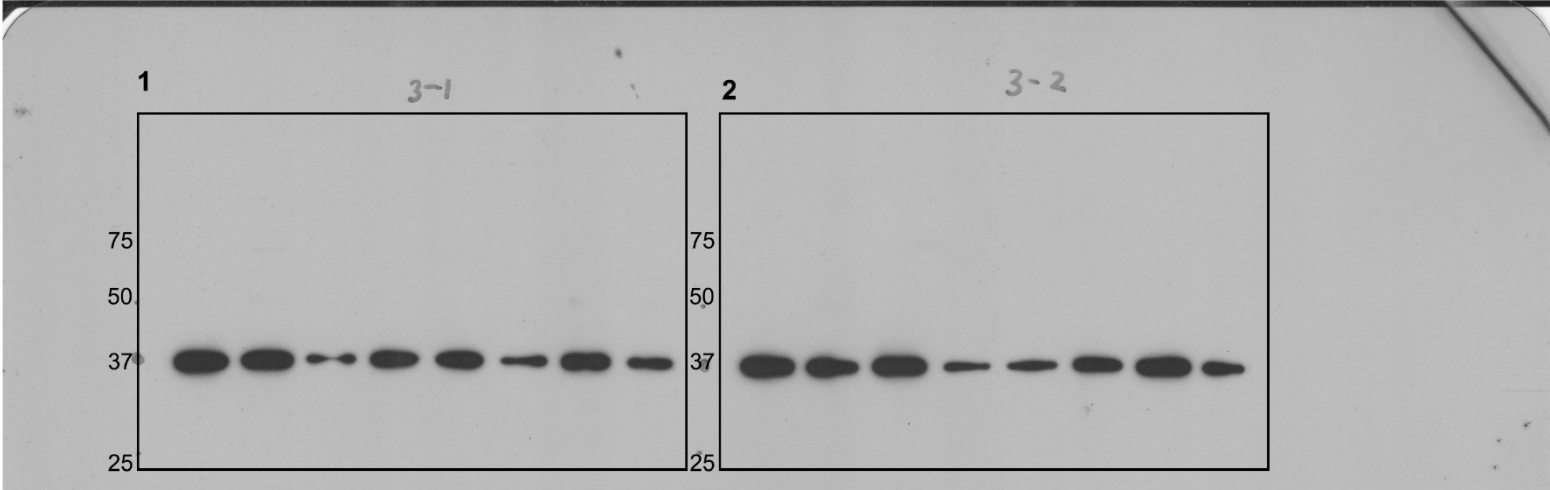

ZD-2 (10 uM)  
DENV 2

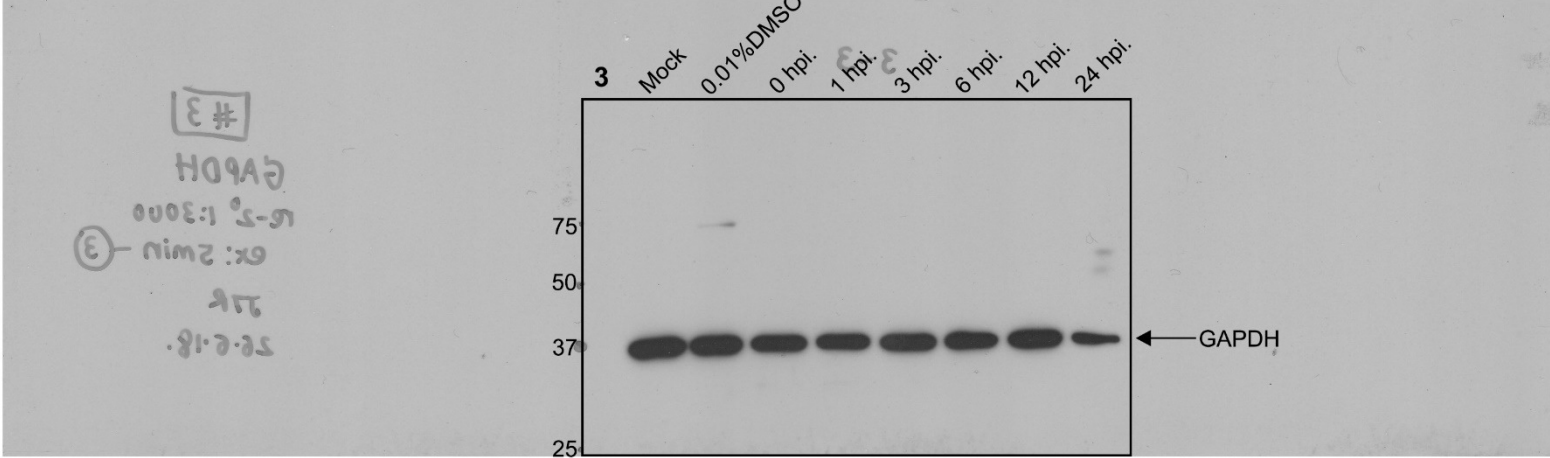

ZD-3

**ZD-3: NS5**

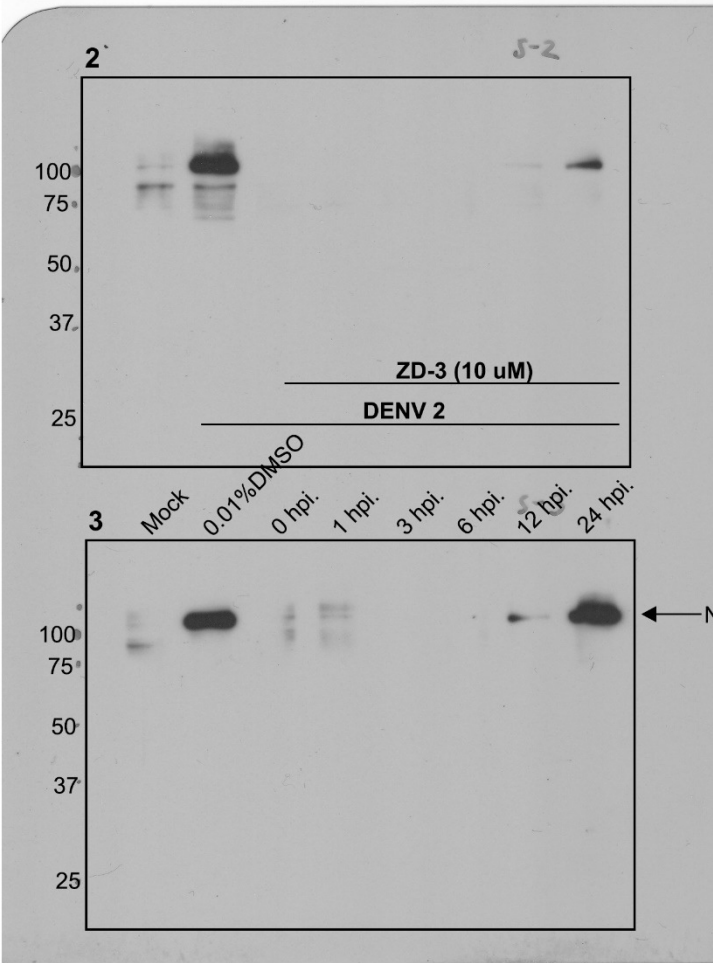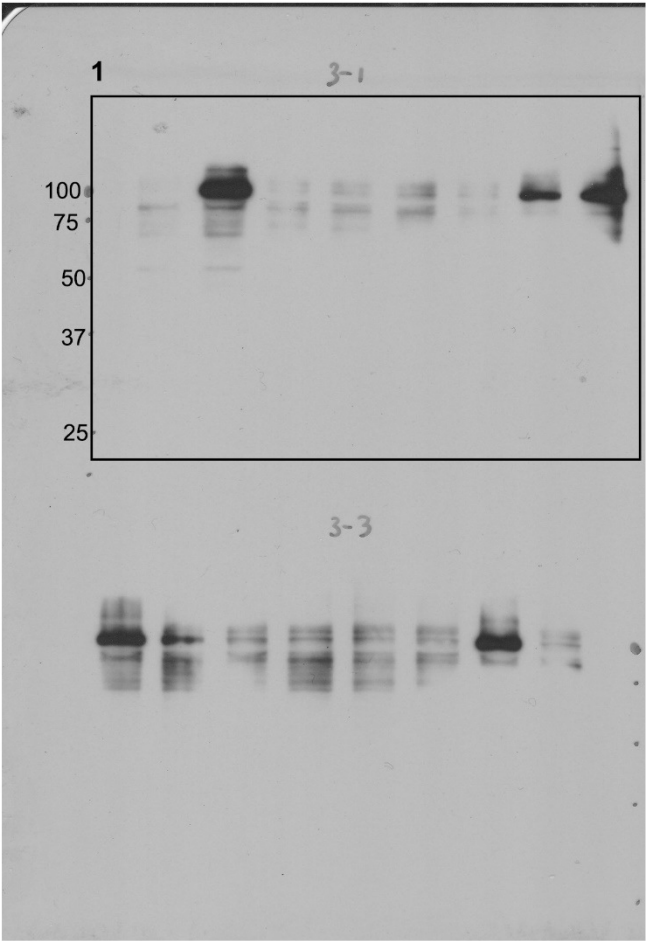

# ZD-3: NS3

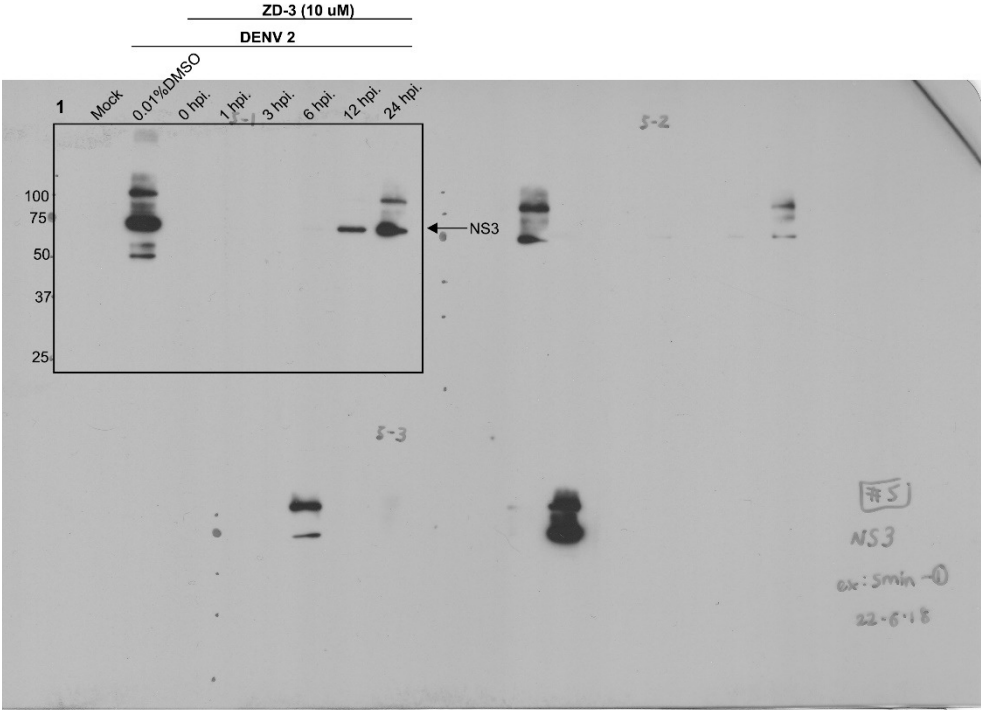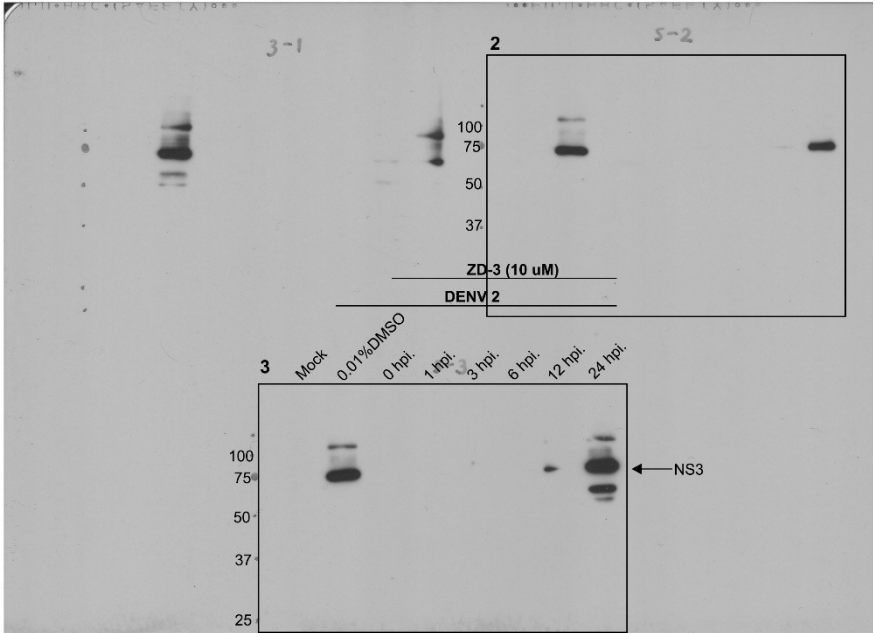

**ZD-3: E**

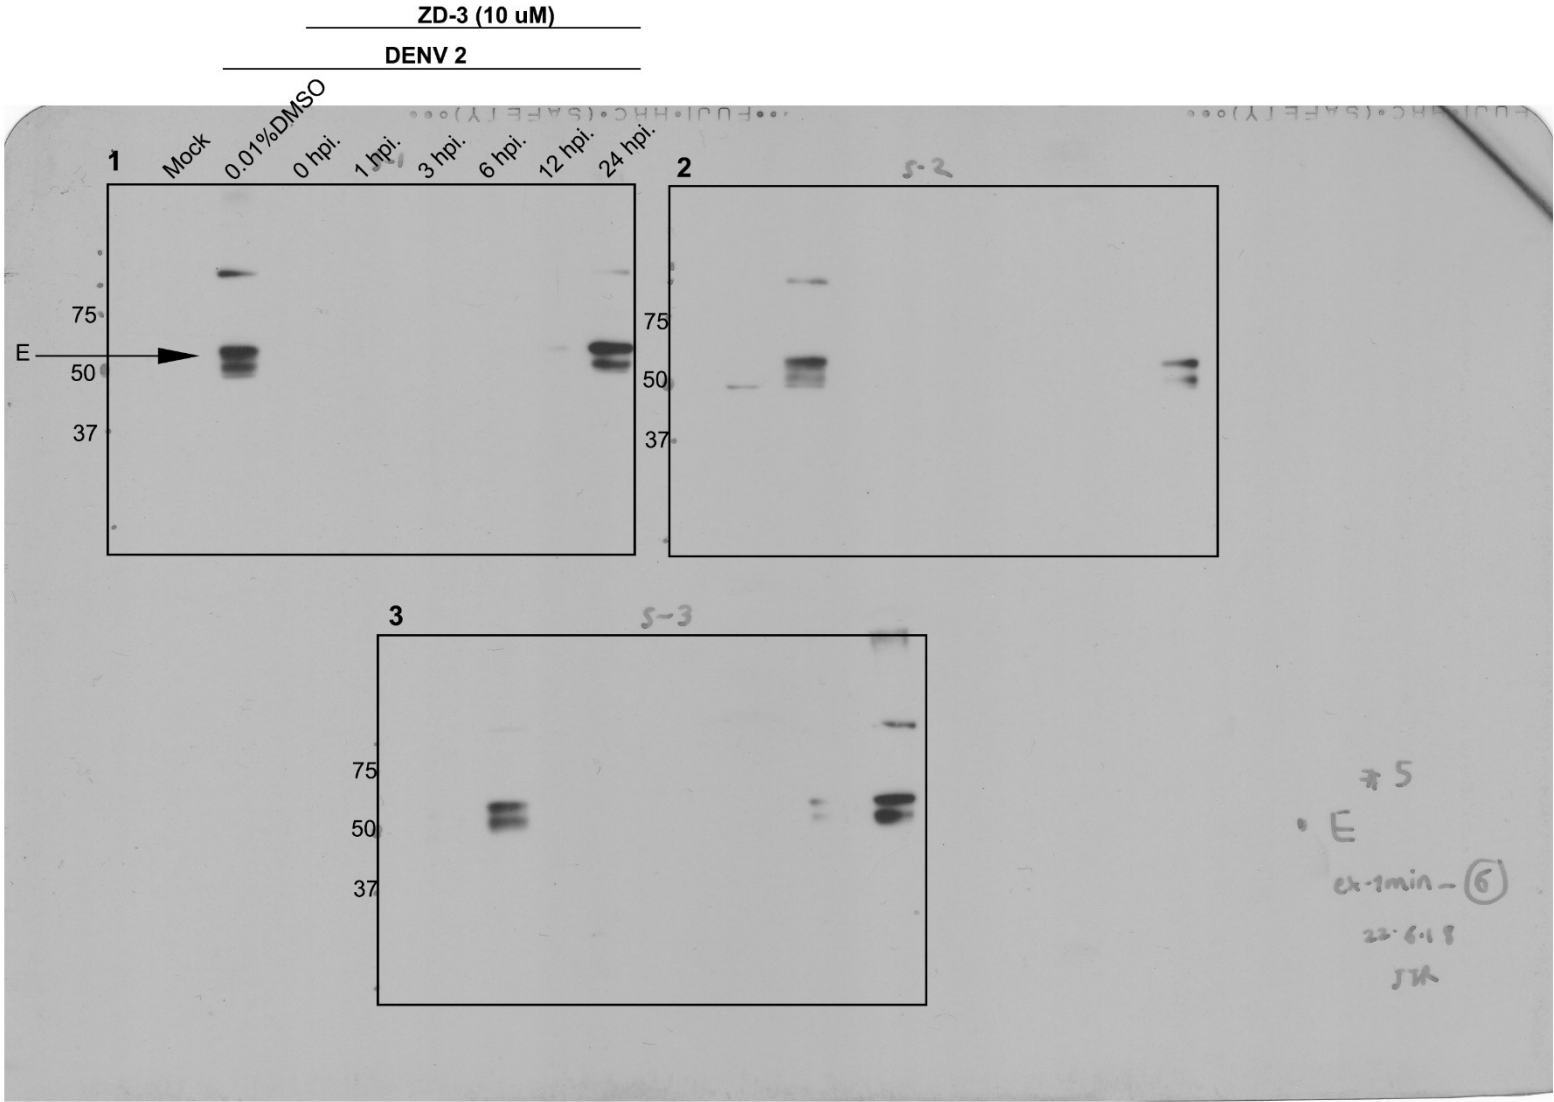



ZD-3: NS1

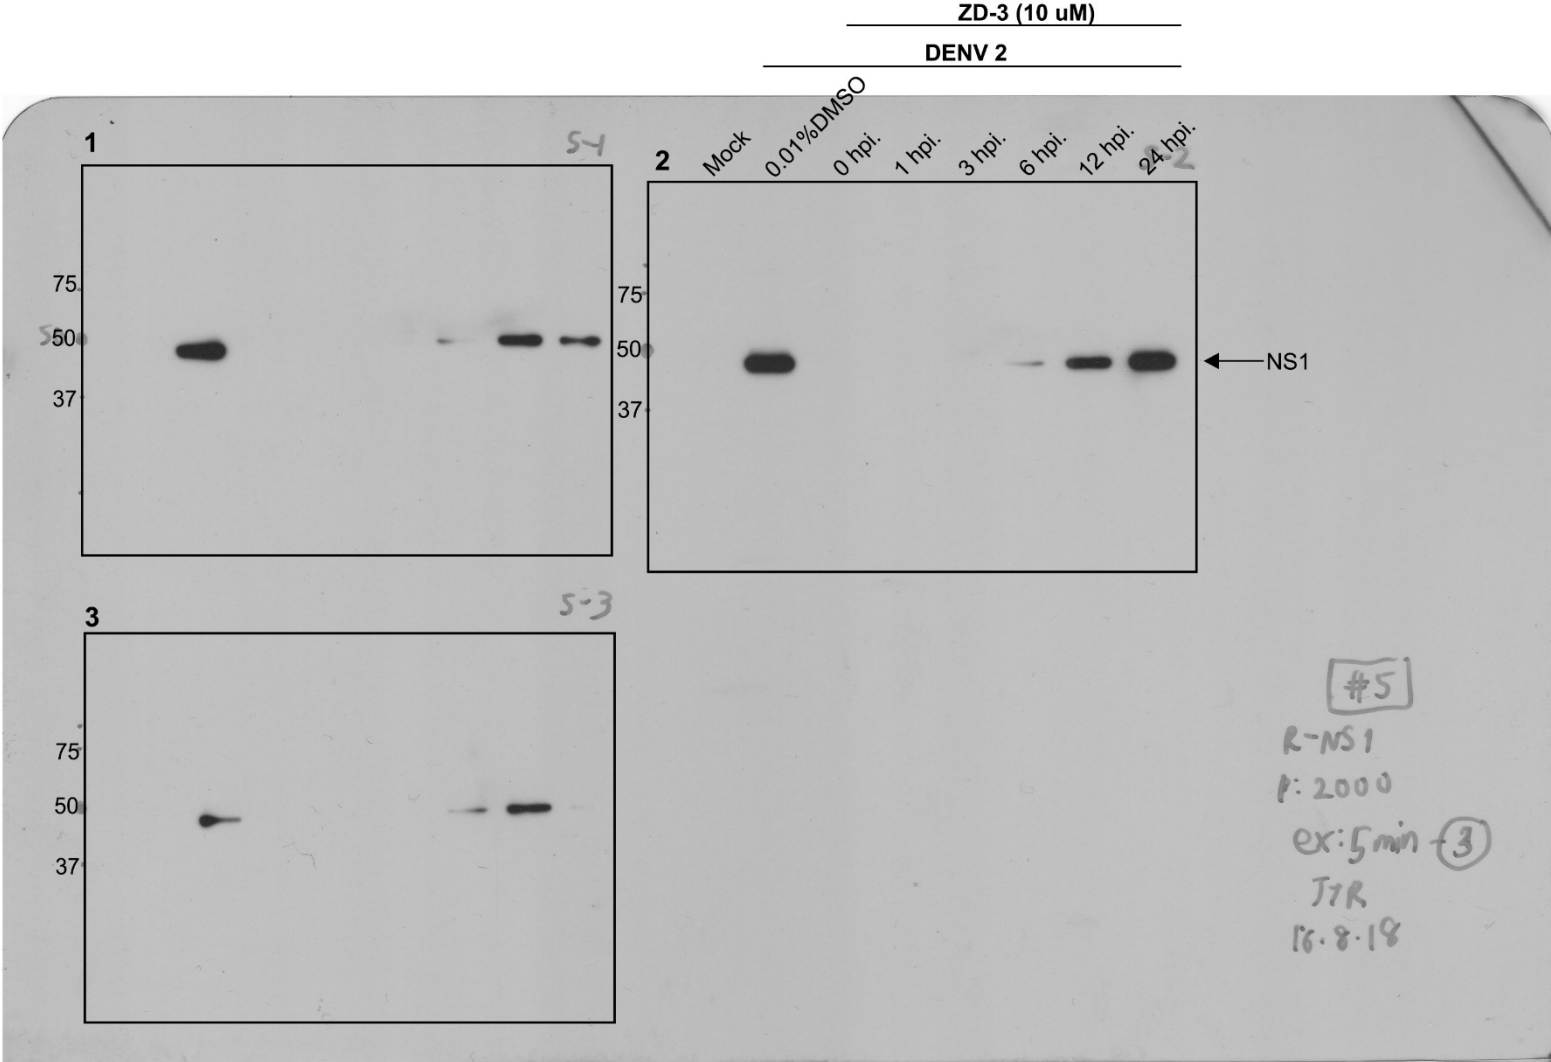

# ZD-3: GAPDH

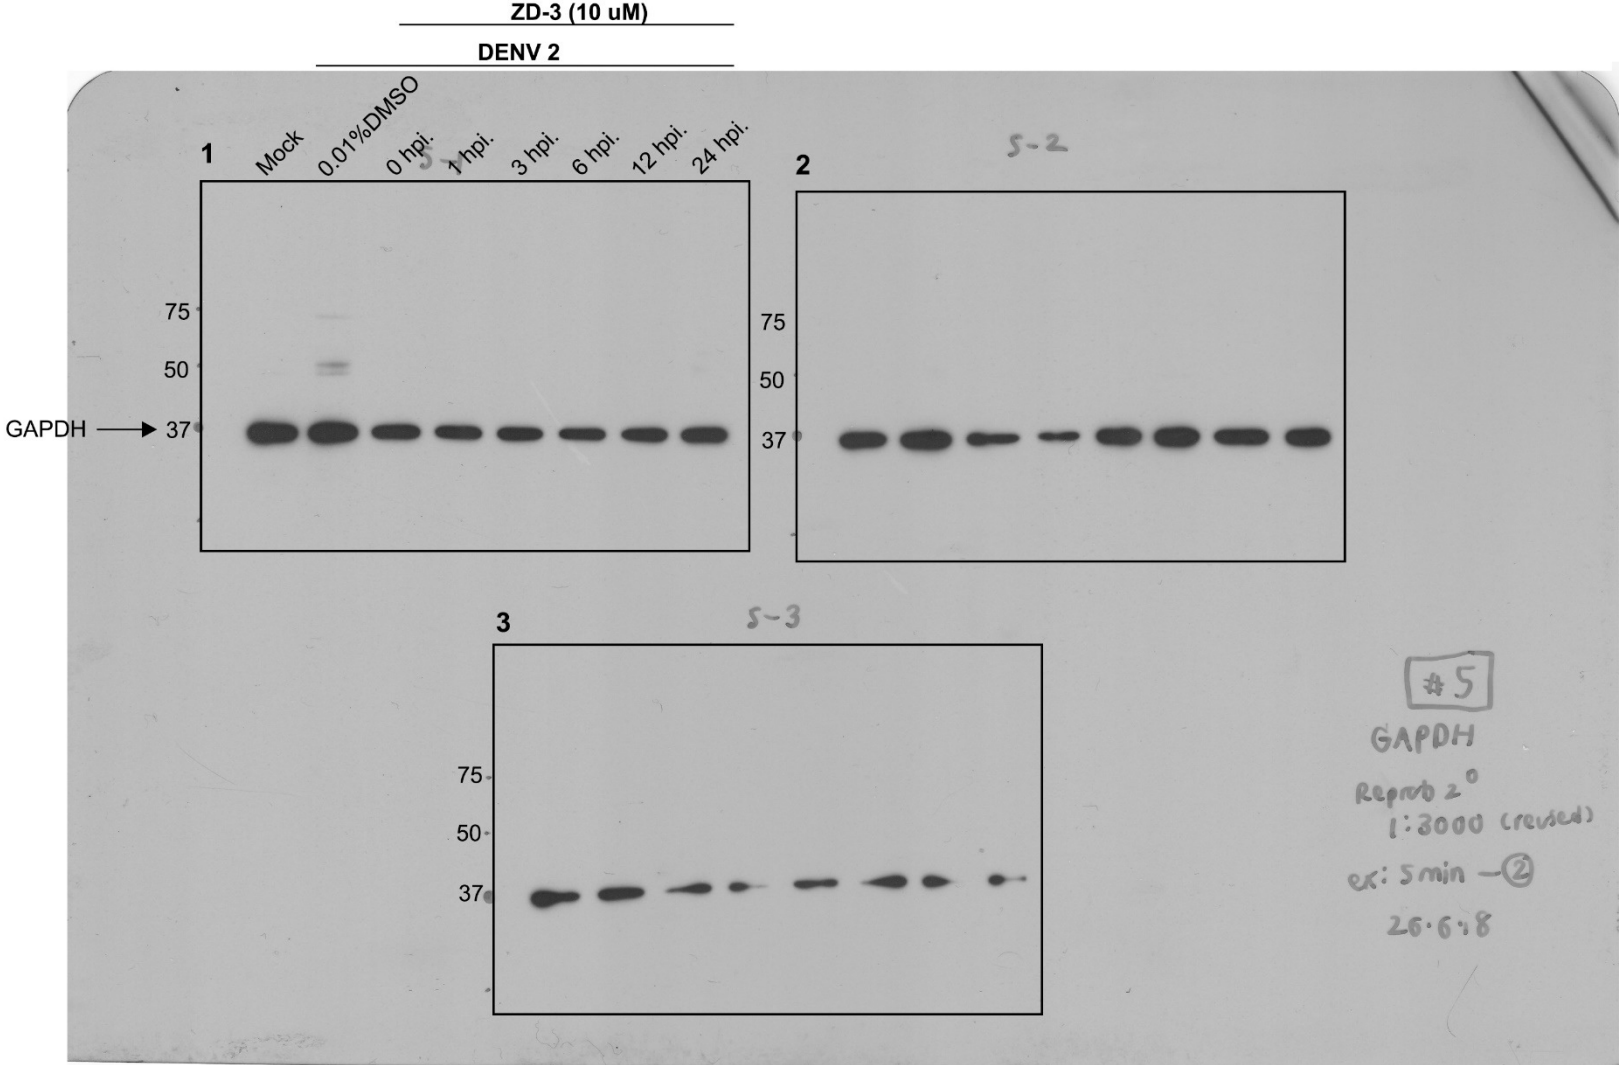

ZD-5

# ZD-5: NS5

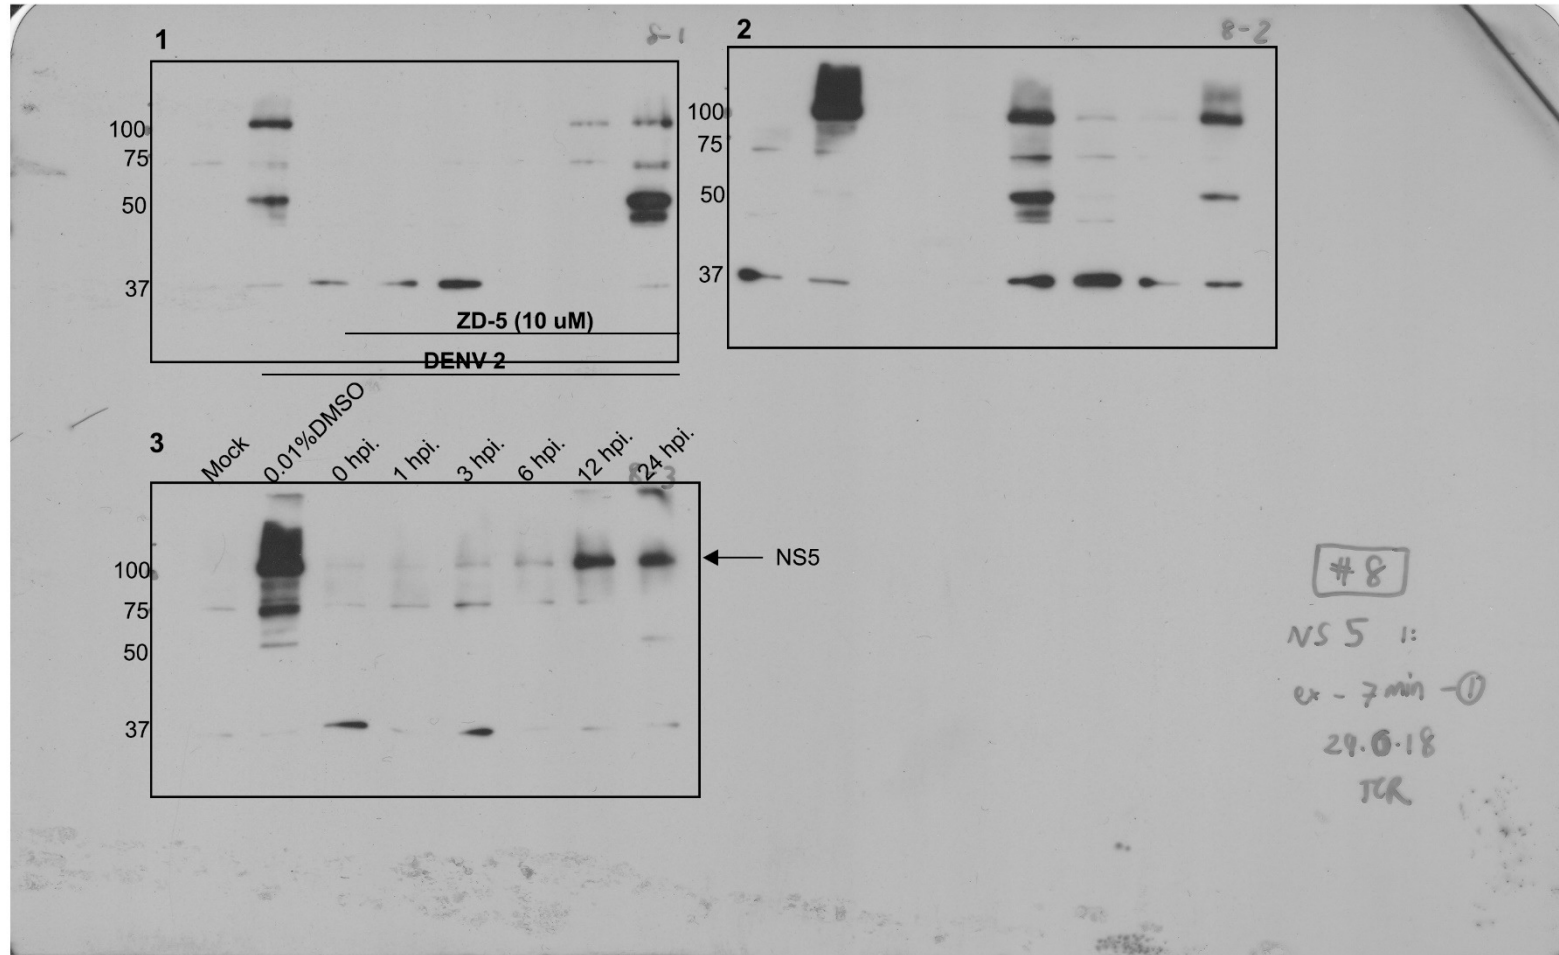

**ZD-5: NS3**

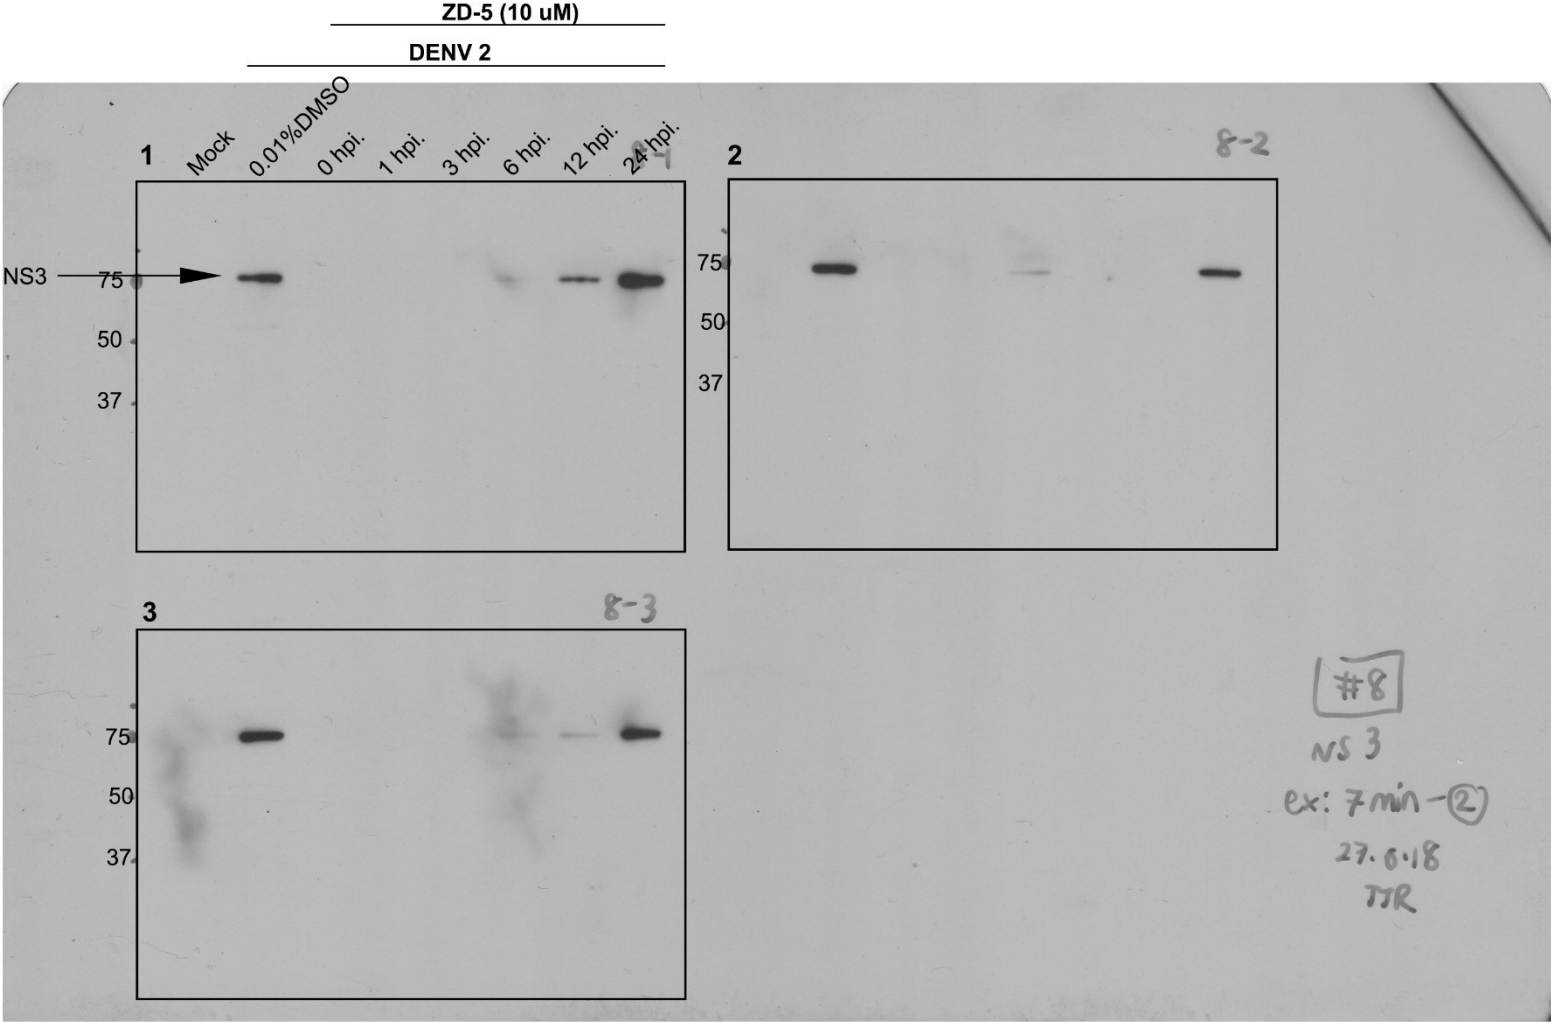

**ZD-5: E**

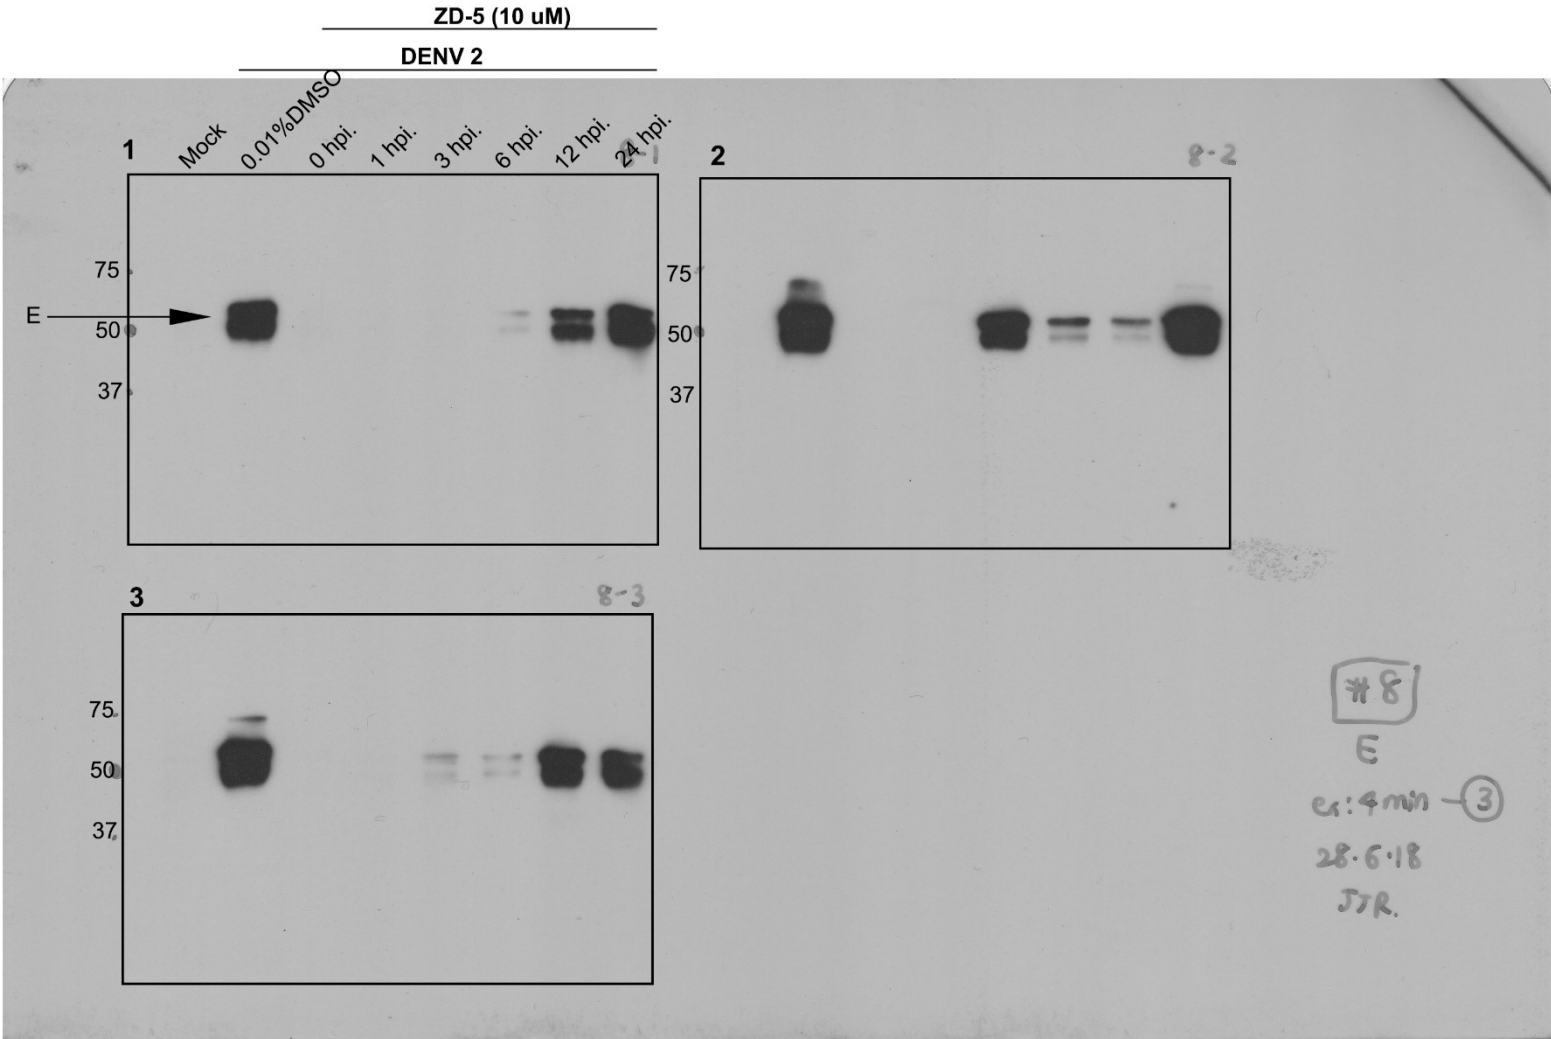

# ZD-5: NS1

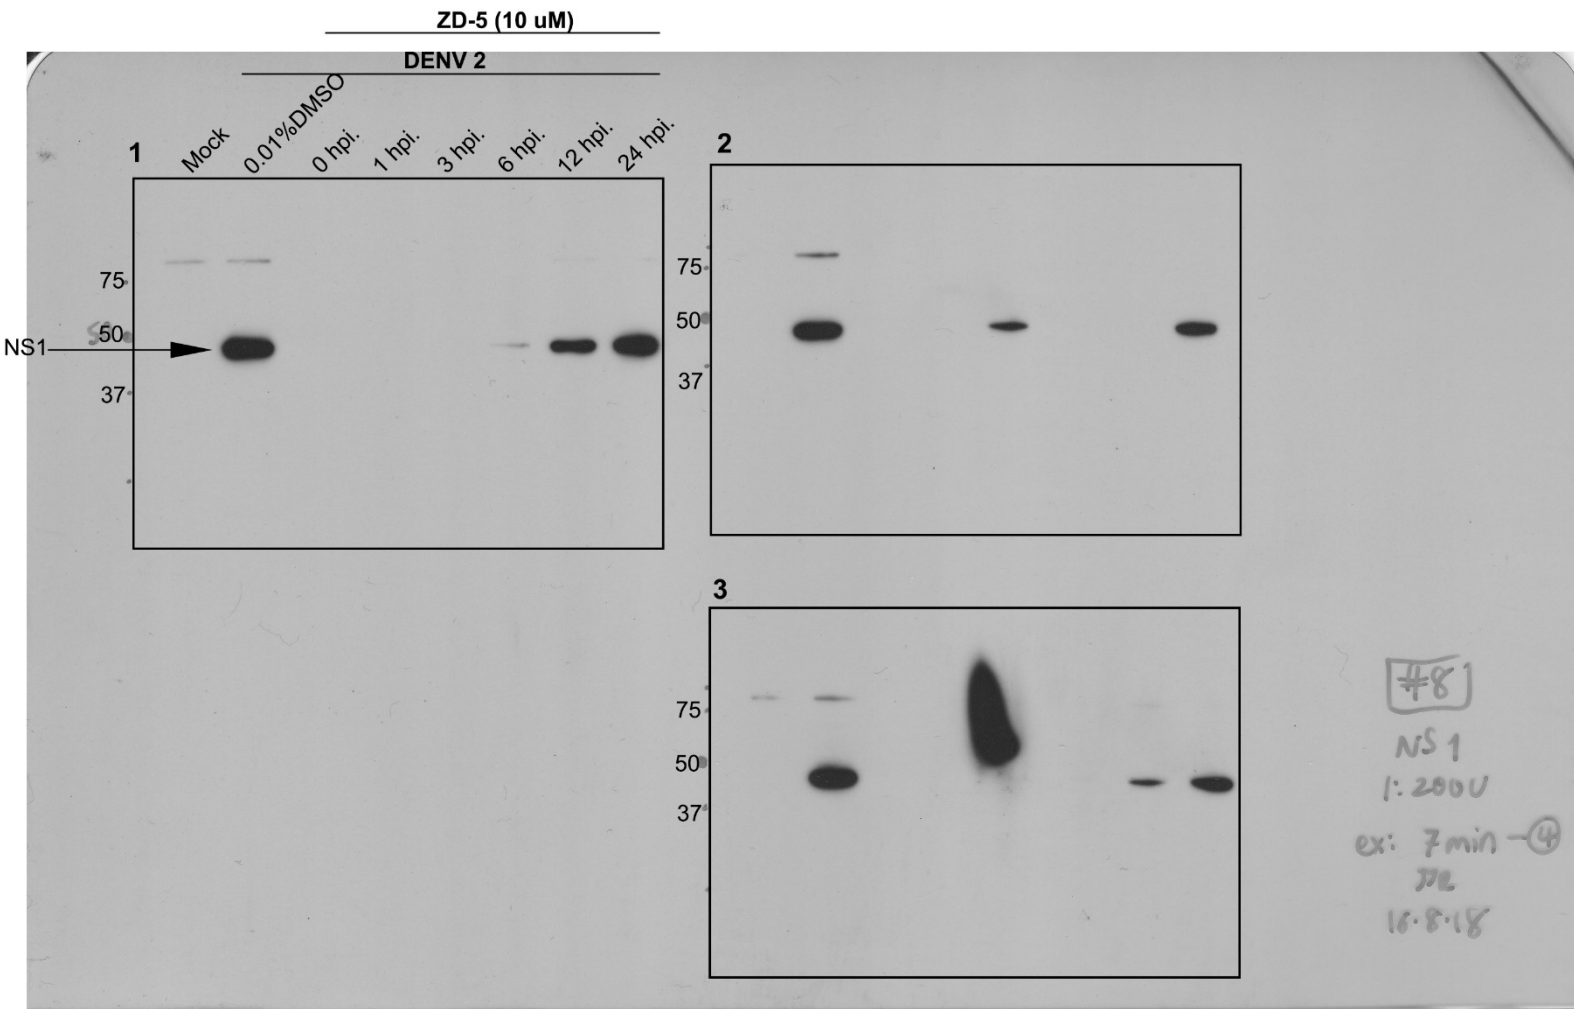

# ZD-5: GAPDH

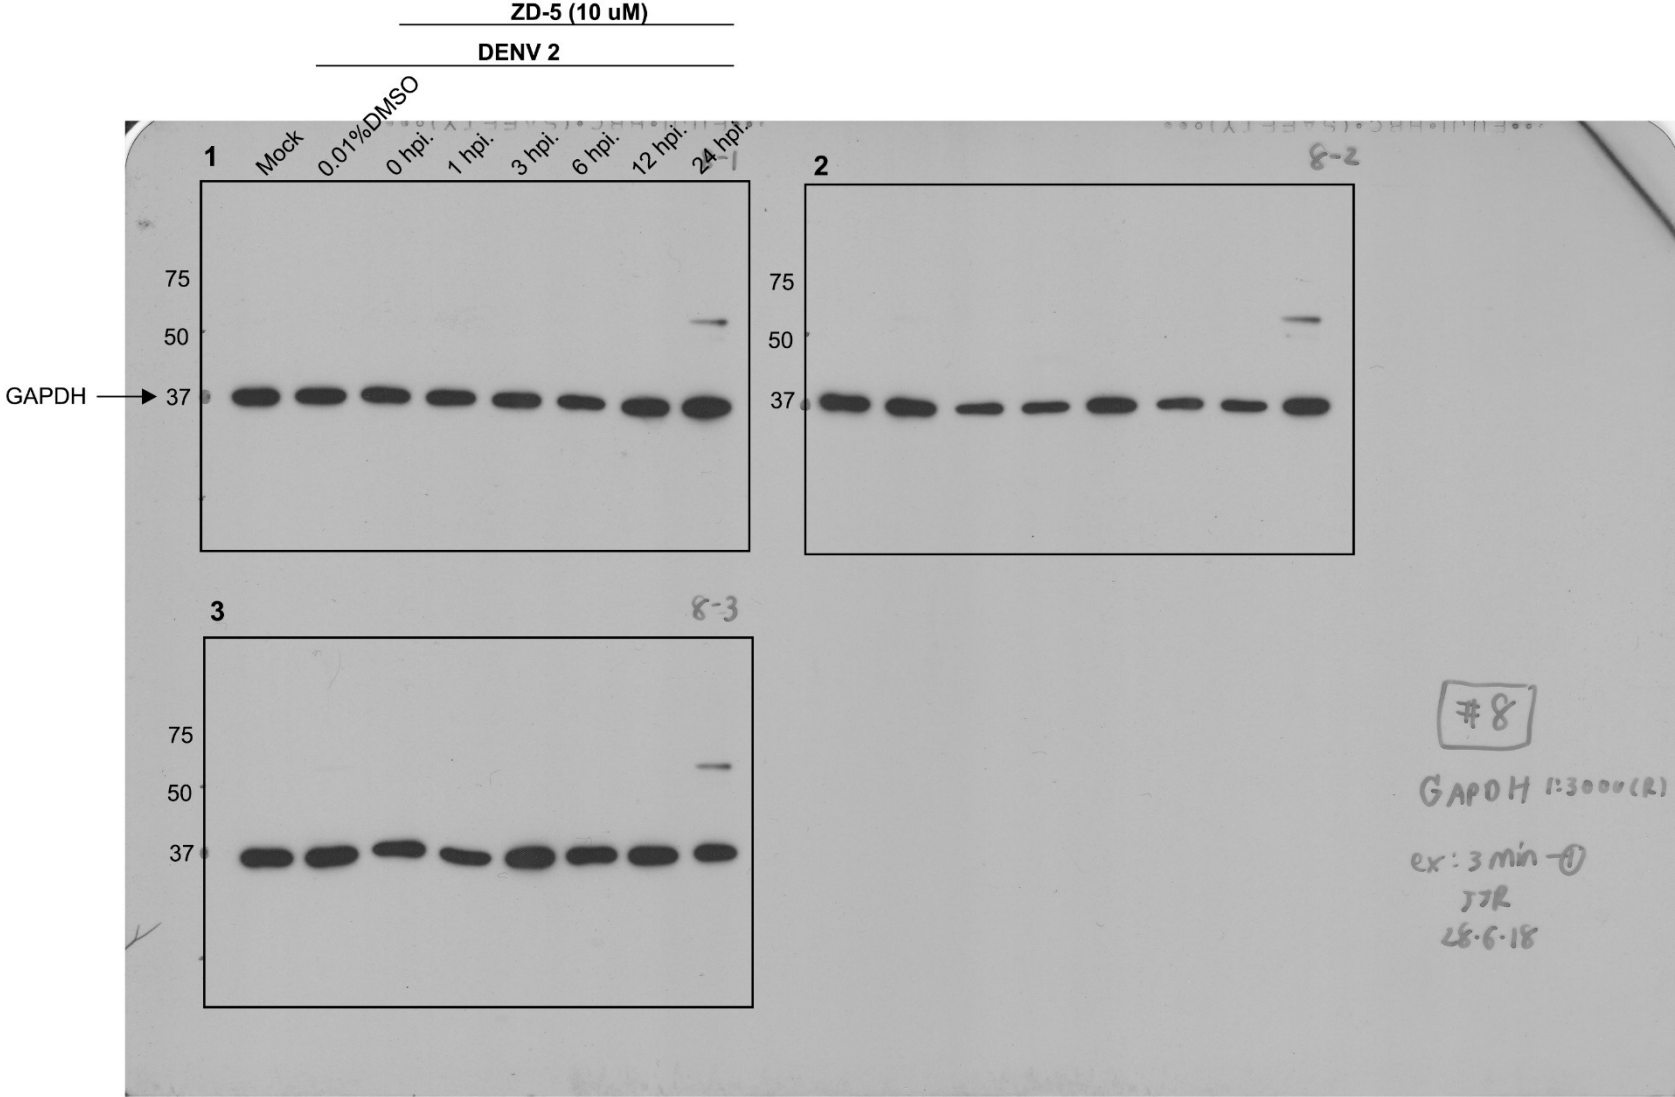



ZD-6

**ZD-6: NS5**

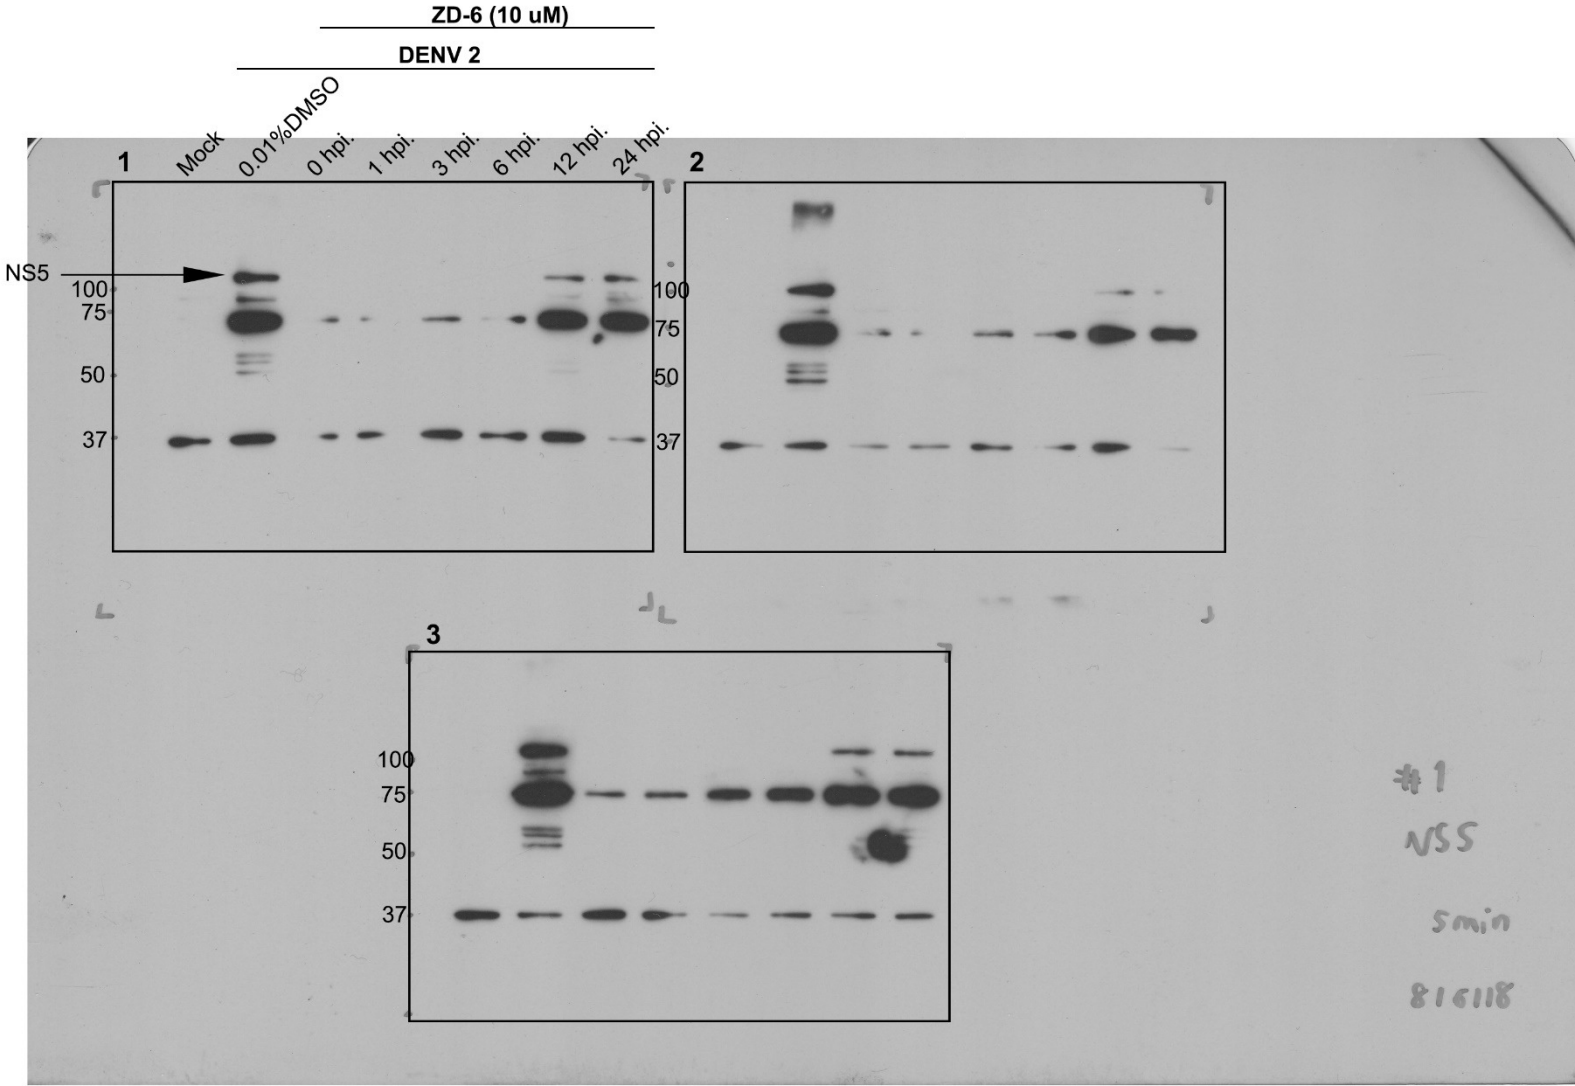

**ZD-6: NS3**

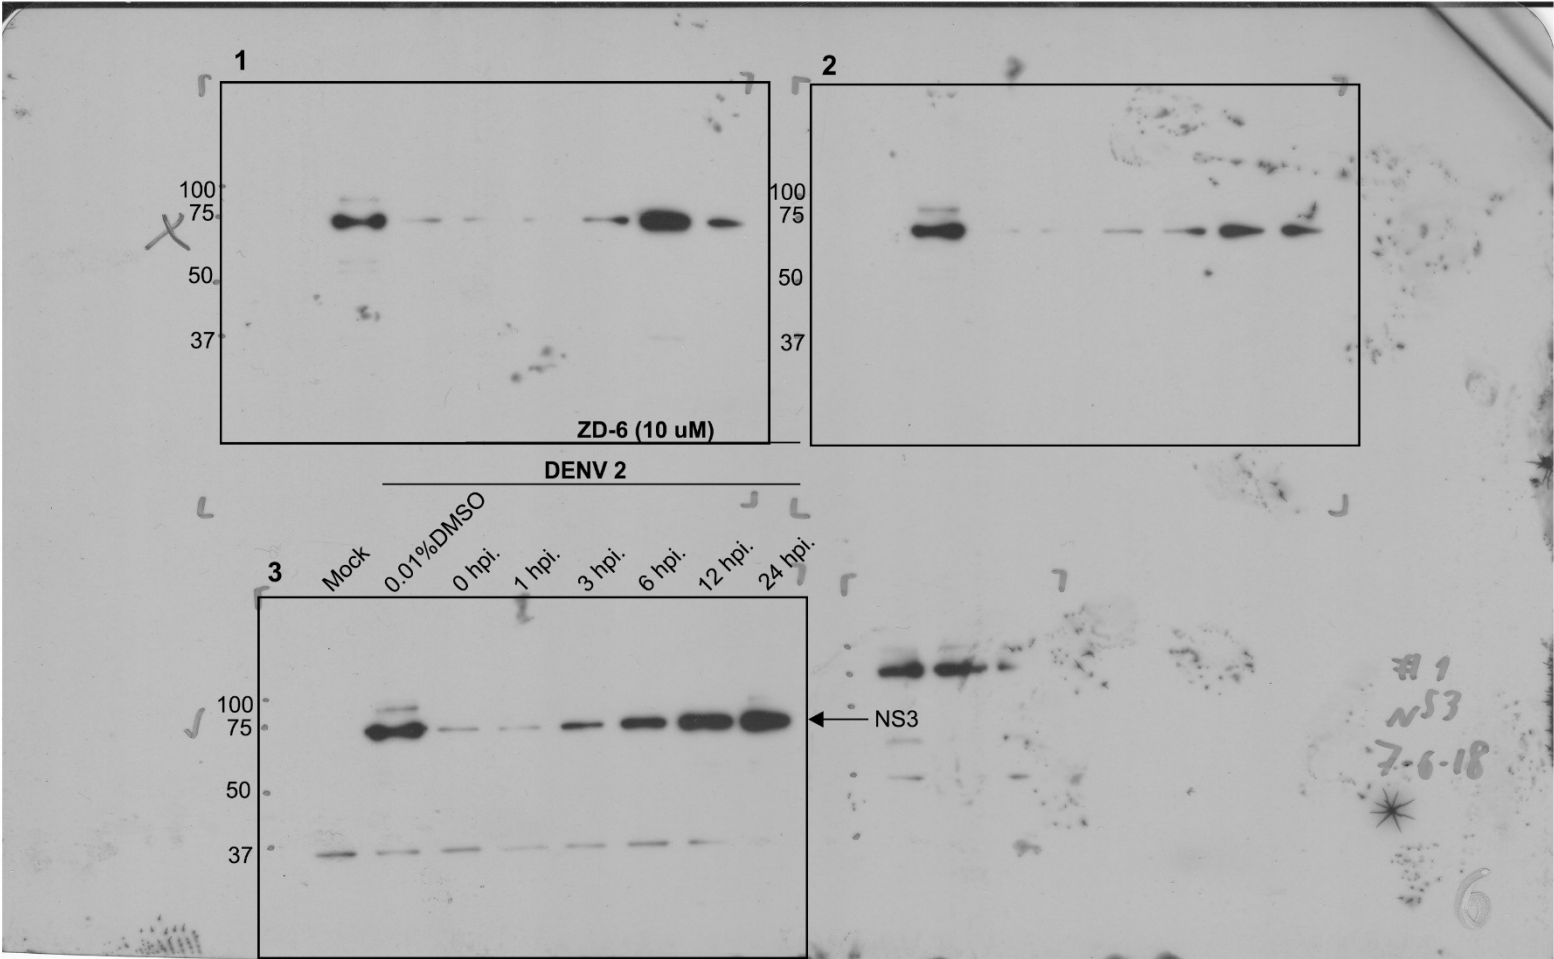

**ZD-6: E**

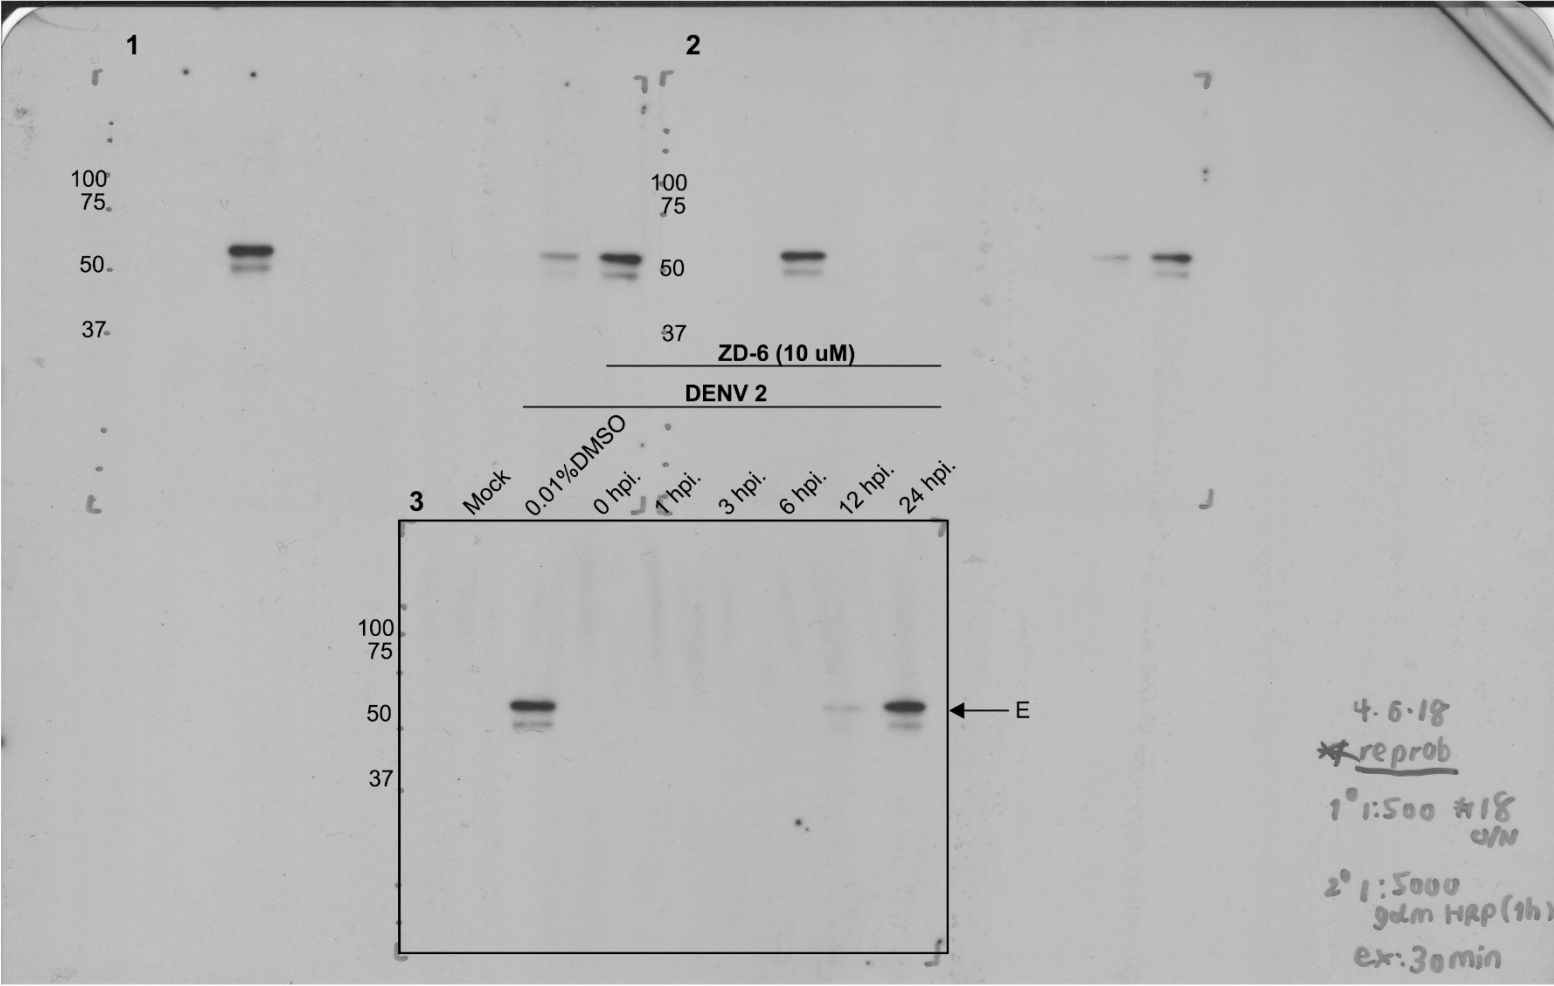

# ZD-6: NS1

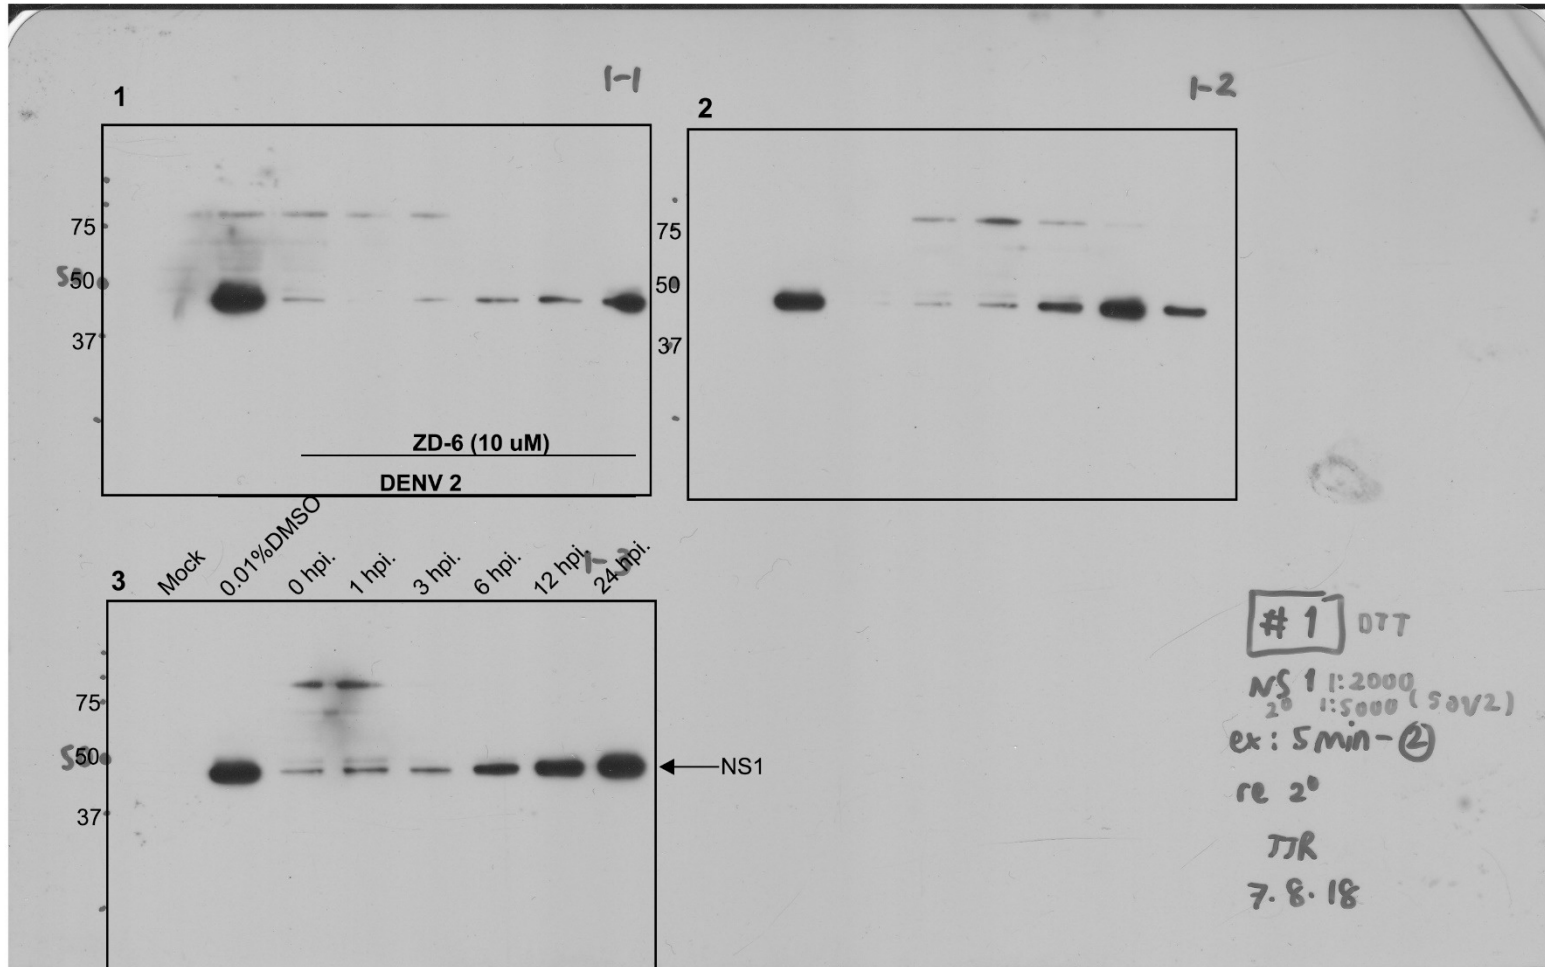

# ZD-6: GAPDH

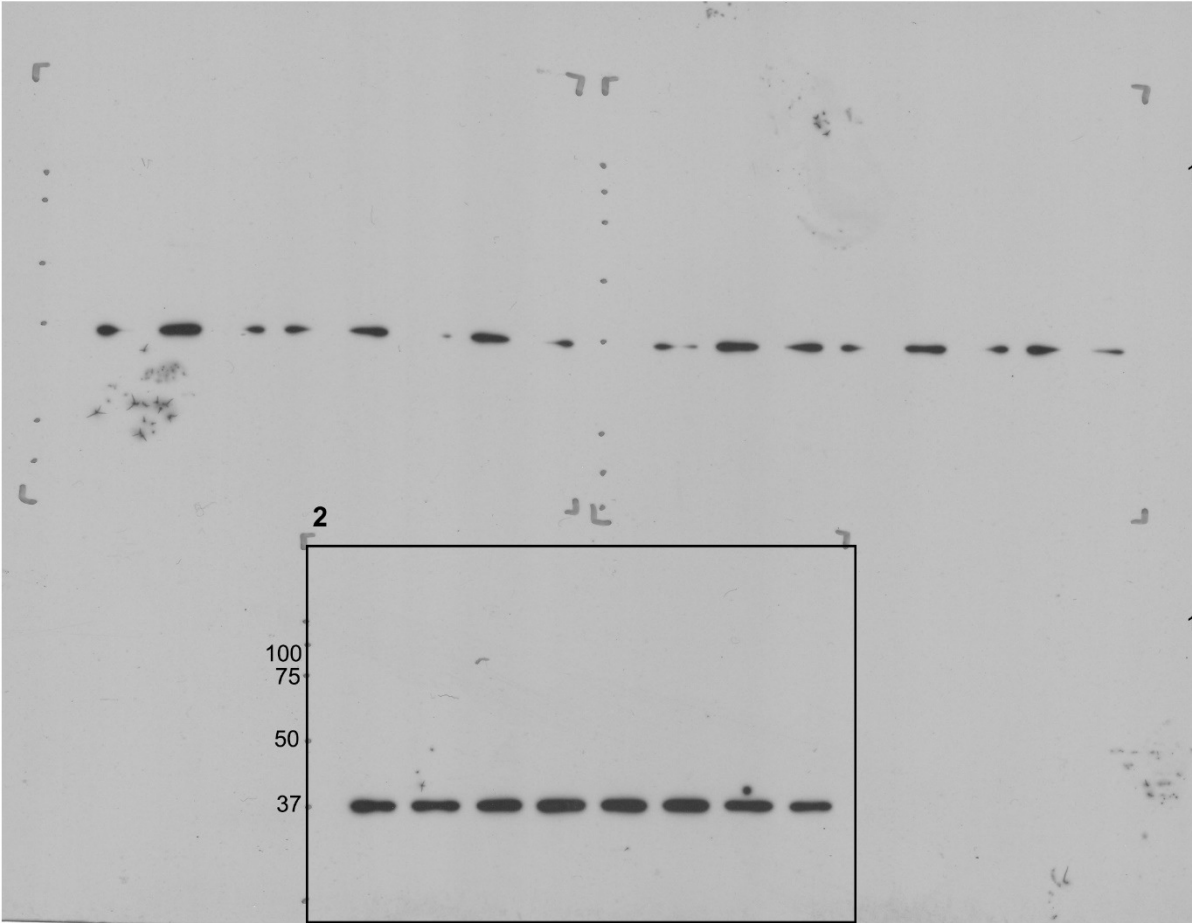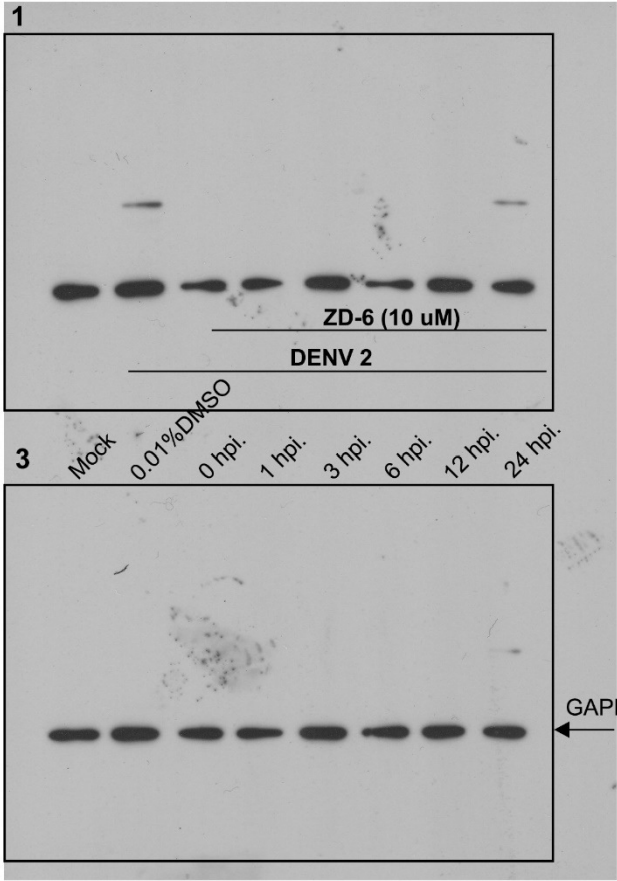

Supplement: 41598_2020_67783_MOESM1_ESM.pdf [file 41598_2020_67783_MOESM1_ESM.pdf]
